# Supplementary material for: Dynamically stable co-assembled supramolecular BOPPY systems with chiral amplification
Source: Royal Society of Chemistry journal article supplement (doi:10.1039/d3cc04727j), 2023-01-01
Supplement: d3cc04727j1.pdf [file d3cc04727j1.pdf]

# Dynamically Stable co-Assembled Supramolecular BOPPY Systems with Chiral Amplification

Yingzhu Sun,<sup>a</sup> Changjiang Yu,<sup>a,\*</sup> Wanping Qian,<sup>a</sup> Hongtao Zhang,<sup>a</sup> Lijuan Jiao,<sup>a</sup>  
Jiazhu Li,<sup>b,\*</sup> Minghua Liu,<sup>c,\*</sup> and Erhong Hao<sup>a,\*</sup>

<sup>a</sup> The Key Laboratory of Functional Molecular Solids, Ministry of Education, School of Chemistry and Materials Science, Anhui Normal University, Wuhu 241002, China. E-mail: [yuchj@ahnu.edu.cn](mailto:yuchj@ahnu.edu.cn), [haoehong@ahnu.edu.cn](mailto:haoehong@ahnu.edu.cn)

<sup>b</sup> College of Chemistry and Chemical Engineering, Yantai University, Yantai, Shandong, China 264005. E-mail: [ljz82@ytu.edu.cn](mailto:lz82@ytu.edu.cn)

<sup>c</sup> Beijing National Laboratory for Molecular Science (BNLMS), CAS Key Laboratory of Colloid, Interface and Chemical Thermodynamics, Institute of Chemistry, Chinese Academy of Sciences, Beijing 100190, China. E-mail: [liumh@iccas.ac.cn](mailto:liumh@iccas.ac.cn)

## Contents:

|                                                                                                                    |     |
|--------------------------------------------------------------------------------------------------------------------|-----|
| 1. General methods.....                                                                                            | S2  |
| 2. Experimental procedures.....                                                                                    | S4  |
| 3. Chiroptical properties in molecular and solid states.....                                                       | S7  |
| 4. AIE properties.....                                                                                             | S12 |
| 5. Chiroptical properties in aggregation states.....                                                               | S13 |
| 6. Helical single crystal packing diagrams.....                                                                    | S20 |
| 7. SEM and TEM images.....                                                                                         | S21 |
| 8. HPLC report of new chiral BOPPYs.....                                                                           | S22 |
| 9. <sup>1</sup> H, <sup>13</sup> C, <sup>11</sup> B and <sup>19</sup> F NMR spectra for the new chiral BOPPYs..... | S24 |
| 10. HRMS for the new chiral BOPPYs.....                                                                            | S32 |
| 11. Author contribution statement.....                                                                             | S34 |

## 1. General methods

Reagents and solvents were used as received from commercial suppliers unless noted otherwise. All reactions were performed in oven-dried or flame-dried glassware unless otherwise stated and monitored by TLC using 0.25 mm silica gel plates with UV indicator.  $^1\text{H}$  and  $^{13}\text{C}$  NMR were recorded on a 400 MHz or 500 MHz NMR spectrometer at room temperature. Chemical shifts ( $\delta$ ) are given in ppm relative to internal TMS in  $\text{CDCl}_3$ . High-resolution mass spectra (HRMS) were obtained using quadrupole-time-of-flight mass spectrometers with APCI ion source in positive mode.

Crystals of (R)-**1a** (CCDC 2232686), (S)-**1a** (CCDC 2232685), and (S)-**1b** (CCDC 2232684) suitable for X-ray analysis were obtained by slow diffusion of hexane into their dichloromethane solutions. Diffraction was performed on a Bruker SMART APEXII CCD area detector diffractometer using graphite-monochromated Mo-K $\alpha$  radiation ( $\lambda = 0.71073 \text{ \AA}$ ) at 293(2) K, with  $\varphi$  and  $\omega$  scan techniques. An empirical absorption correction was applied with the SADABS program. The structures were solved using Olex2<sup>1</sup> by direct methods using the ShelXT structure solution program. Non-hydrogen atoms were anisotropically refined by full-matrix least-squares calculations based on  $F^2$  using the ShelXL program. Hydrogen atom coordinates were calculated with SHELXTL by using an appropriate riding model with varied thermal parameters. The residual electron densities were not chemically significant. The corresponding data could be obtained from the Cambridge Crystallographic Data Centre *via* [www.ccdc.cam.ac.uk/data\\_request/cif](http://www.ccdc.cam.ac.uk/data_request/cif).

UV-visible absorption and fluorescence emission spectra were recorded on commercial spectrophotometers (UV-2450 and Edinburg FLS 1000) at room temperature (10-mm quartz cuvette). Absolute luminescence efficiency ( $\Phi_F$ ) of chiral BOPPY dyes **1a** and **1b** in different solvents are measured by comparing the areas under the corrected emission spectrum of the test sample using an integrating sphere according to the definition of fluorescence efficiency. The enantiomers were analysed by reverse-phase high-pressure liquid chromatography (HPLC) using a chiral Ig

column. The analysis was done by a HPLC system. Chromatography condition: hexane/isopropyl alcohol = 78/22 (v/v), 1 mL/min, 25 °C.

Circular dichroism (CD) spectra were obtained on a BioLogic MOS-500 circular dichroism spectrometer. Samples were prepared for testing in quartz cuvettes with light path of 0.1 mm. For the CD spectroscopy, the difference in absorbance between the left and right circularly polarized light, represented as  $CD = \Delta A = A_{LCP} - A_{RCP}$ , was calculated. The delta absorbance ( $\Delta A$ ) was determined using the Beer-Lambert law, which stated that  $\Delta A = (\epsilon_L - \epsilon_R) \cdot C \cdot L = \Delta \epsilon \cdot C \cdot L$  (where A represents absorbance,  $\Delta \epsilon$  represents molar circular dichroism, C represents molar concentration, and L represents cuvette pathlength). CD spectra were obtained using the Bio-Kine Software, with  $\theta$  being the unit displayed in mdeg (one mdeg equals 0.001 deg) and is also known as standard ellipticity. To convert ellipticity to circular dichroic absorption ( $\Delta A$  or  $\Delta OD$ ), the following equation was used:  $\Delta A = \Delta OD = \theta/32980$ . The parameter gabs is calculated as  $\Delta A/A$ , with values ranging from -1 to 1.

Circularly polarized luminescence (CPL) measurements were performed on an OLIS CPL SOLO spectrometer. The performance of circularly polarized luminescence (CPL) was evaluated by the luminescence dissymmetry factor ( $g_{lum}$ ).  $g_{lum} = 2(I_L - I_R)/(I_L + I_R)$  ( $-2 \leq g_{lum} \leq 2$ ), where  $I_L$  and  $I_R$  mean the strength of the left and right circularly polarized emissions. To calibrate the CPL spectrometer, standard  $Eu(facam)_3$  (Europium(III) tris[3-(trifluoromethylhydroxymethylene)-d-camphorate]) (1 mM in DMSO) was used. The emission wavelength range was set from 570 nm to 640 nm. The theoretical value of  $g_{lum}$  for  $Eu(facam)_3$  has been reported to peak at approximately -0.78 at 595 nm. The measured value was about -0.77 at 595 nm, which was agreed to the theoretical value. For the CPL test of a co-assembled supramolecular system, the sample was shaken and placed in a quartz cell. For the solid CPL, KBr and our BOPPY (mass ratio = 50:1) were carefully grounded together and pressed onto two quartz slides. A number of spectra were accumulated and then averaged to reduce the influence of accidental errors. All samples were excited at 390 nm unless otherwise noted.

Scanning electron microscopy (SEM) images were recorded on a Hitachi S-4800

FE-SEM instrument with an accelerating voltage of 10 kV, the samples were prepared on single-crystal silicon wafer, dried under vacuum, and coated with a thin layer of Pt to increase the contrast. Transmission electron microscopy (TEM) images were obtained on a T20 electron microscope at an accelerating voltage of 110 kV. A small amount of the suspension was diluted with a mixed solvent of acetonitrile/di-water, dropped on the surface of the copper mesh of the carbon support film, dried in vacuum, and observed under an electron microscope. Laser scanning confocal microscopy (LSCM) images were recorded on a Leica instrument with an accelerating voltage of 10 kV, the samples were prepared on quartz plate, dried under vacuum.

## 2. Experimental procedures

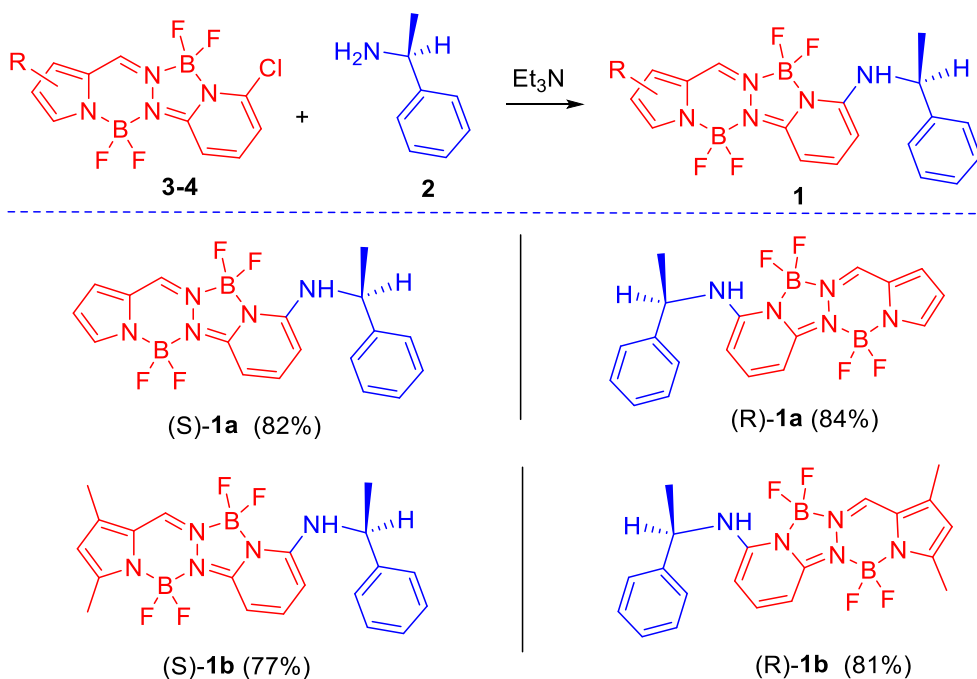

**Scheme S1.** The synthesis and yields of (S/R)-1-phenylethan-1-amine modified BOPPYs **1a-b**.

The general synthesis procedures for BOPPYs **1a** and **1b**

To BOPPY dye **3** (0.2 mmol) in 1,2-dichloroethane (60 mL) were added (R/S)-1-phenylethan-1-amine **2a** or **2b** (1.2 mmol, 6 equiv.) and  $\text{Et}_3\text{N}$  (0.6 mmol, 3 equiv.). The reaction mixture was stirred at 80 °C for 12 h. After that, the reaction mixture was removed under vacuum. The crude product was purified from chromatograph (silica gel, hexane/ $\text{CH}_2\text{Cl}_2$  = 1/1, v/v), obtaining the chiral BOPPY as a yellow or orange powder.

**Synthesis of (S)-1a:** (S)-1a was prepared from BOPPY dye **3** (89 mg, 0.28 mmol), Et<sub>3</sub>N (0.12 mL, 0.84 mmol, 3 equiv.) and (S)-1-phenylethan-1-amine **2a** (0.22 mL, 1.7 mmol, 6 equiv.) as a yellow solid in 82% yield (93 mg, 0.23 mmol). (S)-1a was measured by HPLC using a chiral stationary phase [*n*-hexane:*i*-PrOH = 82:18, 1 mL/min), t<sub>R</sub> = 11.442 min]. <sup>1</sup>H NMR (500 MHz, CDCl<sub>3</sub>) δ 7.73 (s, 1H), 7.59 (s, 1H), 7.49 (t, *J* = 8.3 Hz, 1H), 7.40 – 7.34 (m, 2H), 7.33 – 7.26 (m, 3H), 7.03 (d, *J* = 3.4 Hz, 1H), 6.67 (d, *J* = 8.2 Hz, 1H), 6.57 (dd, *J* = 3.6, 2.1 Hz, 1H), 5.78 (d, *J* = 8.3 Hz, 1H), 5.56 (d, *J* = 4.5 Hz, 1H), 4.66 – 4.57 (m, 1H), 1.64 (d, *J* = 6.8 Hz, 3H). <sup>13</sup>C NMR (101 MHz, CDCl<sub>3</sub>) δ 150.8, 150.34, 145.3, 142.1, 132.4, 130.5, 129.3, 128.1, 125.5, 121.6, 115.7, 97.5, 96.7, 53.2, 24.7. <sup>11</sup>B NMR (128 MHz, CDCl<sub>3</sub>) δ 3.14 (t, *J* = 29.0 Hz), 1.13 (t, *J* = 29.2 Hz). <sup>19</sup>F NMR (377 MHz, CDCl<sub>3</sub>) δ -142.31 – -143.63 (m, 2F), -148.10 (m, 2F). HRMS (APCI) calcd. for C<sub>18</sub>H<sub>18</sub>B<sub>2</sub>F<sub>4</sub>N<sub>5</sub>[M + H]<sup>+</sup>: 402.1684, found: 402.1670.

**Synthesis of (R)-1a:** (R)-1a was prepared from BOPPY dye **3** (102 mg, 0.32 mmol), Et<sub>3</sub>N (0.13 mL, 0.97 mmol, 3 equiv.) and (R)-1-phenylethan-1-amine **2b** (0.25 mL, 1.94 mmol, 6 equiv.) as a yellow solid in 84% yield (109 mg, 0.23 mmol). (R)-1a was measured by HPLC using a chiral stationary phase [*n*-hexane:*i*-PrOH = 82:18, 1 mL/min), t<sub>R</sub> = 12.567 min]. <sup>1</sup>H NMR (400 MHz, CDCl<sub>3</sub>) δ 7.72 (s, 1H), 7.59 (s, 1H), 7.48 (t, *J* = 8.3 Hz, 1H), 7.41 – 7.33 (m, 2H), 7.31 (d, *J* = 7.4 Hz, 3H), 7.02 (d, *J* = 3.7 Hz, 1H), 6.67 (d, *J* = 8.3 Hz, 1H), 6.56 (dd, *J* = 3.7, 2.2 Hz, 1H), 5.77 (d, *J* = 8.3 Hz, 1H), 5.55 (d, *J* = 5.3 Hz, 1H), 4.82 – 4.45 (m, 1H), 1.63 (d, *J* = 6.8 Hz, 3H). <sup>13</sup>C NMR (101 MHz, CDCl<sub>3</sub>) δ 150.8, 150.4, 145.3, 142.1, 132.4, 130.5, 129.3, 125.5, 124.4, 121.6, 97.4, 96.6, 53.2, 24.6. <sup>11</sup>B NMR (128 MHz, CDCl<sub>3</sub>) δ 3.15 (d, *J* = 57.7 Hz), 1.14 (t, *J* = 29.2 Hz). <sup>19</sup>F NMR (376 MHz, CDCl<sub>3</sub>) δ -142.51 – -143.92 (m, 2F), -148.08 (m, 2F). HRMS (APCI) calcd. for C<sub>18</sub>H<sub>18</sub>B<sub>2</sub>F<sub>4</sub>N<sub>5</sub> [M + H]<sup>+</sup>: 402.1684, found: 402.1694.

**Synthesis of (S)-1b:** (S)-1b was prepared from BOPPY dye **4** (82 mg, 0.24 mmol), Et<sub>3</sub>N (0.1 mL, 0.71 mmol, 3 equiv.) and (S)-1-phenylethan-1-amine **2a** (0.18 mL, 1.4 mmol, 6 equiv.) as a yellow solid in 77% yield (79 mg, 0.18 mmol). (S)-1b was measured by HPLC using a chiral stationary phase [*n*-hexane:*i*-PrOH = 82:18, 1 mL/min), t<sub>R</sub> = 9.975 min]. <sup>1</sup>H NMR (500 MHz, CDCl<sub>3</sub>) δ 7.57 (s, 1H), 7.43 (t, *J* = 8.4 Hz, 1H), 7.40 – 7.34 (m, 2H), 7.34 – 7.27 (m, 3H), 6.63 (d, *J* = 8.4 Hz, 1H), 6.13 (s, 1H), 5.69 (d, *J* = 8.2 Hz, 1H), 5.53 (d, *J* = 5.8 Hz, 1H), 4.62 (m, 1H), 2.47 (s, 3H),

2.31 (s, 3H), 1.64 (d,  $J = 6.8$  Hz, 3H).  $^{13}\text{C}$  NMR (126 MHz,  $\text{CDCl}_3$ )  $\delta$  150.5, 150.3, 146.5, 144.5, 142.3, 135.0, 129.1, 127.8, 127.3, 125.4, 122.8, 117.3, 96.4, 96.1, 53.0, 24.6, 13.9, 10.9.  $^{11}\text{B}$  NMR (128 MHz,  $\text{CDCl}_3$ )  $\delta$  3.12 (t,  $J = 29.4$  Hz), 1.06 (t,  $J = 31.2$  Hz).  $^{19}\text{F}$  NMR (471 MHz,  $\text{CDCl}_3$ )  $\delta$  -140.66 – -142.23 (m, 2F), -147.37 (m, 2F). HRMS (APCI) calcd. for  $\text{C}_{20}\text{H}_{21}\text{B}_2\text{F}_3\text{N}_5[\text{M} - \text{F}]^+$ : 410.1935, found: 410.1942.

**Synthesis of (R)-1b:** (R)-1b was prepared from BOPPY dye **4** (103 mg, 0.3 mmol),  $\text{Et}_3\text{N}$  (0.12 mL, 0.90 mmol, 3 equiv.) and (R)-1-phenylethan-1-amine **2b** (0.23 mL, 1.8 mmol, 6 equiv.) as a yellow solid in 81% yield (104 mg, 0.24 mmol). (R)-1b was measured by HPLC using a chiral stationary phase [*n*-hexane:*i*-PrOH = 82:18, 1 mL/min),  $t_{\text{R}} = 10.425$  min].  $^1\text{H}$  NMR (500 MHz,  $\text{CDCl}_3$ )  $\delta$  7.57 (s, 1H), 7.43 (t,  $J = 8.4$  Hz, 1H), 7.40 – 7.34 (m, 2H), 7.34 – 7.27 (m, 3H), 6.63 (d,  $J = 8.4$  Hz, 1H), 6.13 (s, 1H), 5.69 (d,  $J = 8.2$  Hz, 1H), 5.53 (d,  $J = 5.8$  Hz, 1H), 4.62 (m, 1H), 2.47 (s, 3H), 2.31 (s, 3H), 1.64 (d,  $J = 6.8$  Hz, 3H).  $^{13}\text{C}$  NMR (126 MHz,  $\text{CDCl}_3$ )  $\delta$  150.5, 150.3, 146.5, 144.5, 142.3, 135.0, 129.1, 127.8, 127.2, 125.4, 122.8, 117.3, 96.4, 96.1, 53.0, 24.6, 13.9, 10.9.  $^{11}\text{B}$  NMR (128 MHz,  $\text{CDCl}_3$ )  $\delta$  3.12 (t,  $J = 29.3$  Hz), 1.06 (t,  $J = 31.2$  Hz).  $^{19}\text{F}$  NMR (471 MHz,  $\text{CDCl}_3$ )  $\delta$  -140.71 – -141.99 (m, 2F), -146.65 – -148.05 (m, 2F). HRMS (APCI) calcd. for  $\text{C}_{20}\text{H}_{21}\text{B}_2\text{F}_3\text{N}_5[\text{M} - \text{F}]^+$ : 410.1935, found: 410.1931.

Taking the preparation of as an example.

**Preparation of SDS aqueous solution:** To 60 mL deionized aqueous solution was added sodium dodecyl sulfate (120 mg, 0.42 mmol), and ultrasonically assisted dissolution for 1 min to obtain SDS aqueous solution with a concentration of 2 mg/mL.

**Preparation of acetonitrile stock of chiral BOPPY dyes:** (S)-1a (2.0 mg, 5  $\mu\text{mol}$ ) was dissolved in pure acetonitrile (1.7 mL) and then ultrasonically assisted dissolution for 1 min to obtain the stock acetonitrile solution with a concentration of 3 mM.

**Synthesis of (S/R)-1a micelles:** The prepared SDS aqueous solution (3 mL, 2 mg/mL) was placed in a 4 mL centrifuge tube, and the acetonitrile stock solution (S/R)-1a (10  $\mu\text{L}$ , 3 mM) was injected with a pipetting gun to form the concentration of (S/R)-1a in the mixed solution of 10  $\mu\text{M}$ . The cover of the centrifuge tube was covered, and the solution was shaken up and down for 20 times, and then left to age at room temperature (25  $^\circ\text{C}$ ) for 96 h to obtain stable BOPPY micelles.

**Synthesis of (S/R)-1a assembled microrods:** The prepared SDS aqueous solution (3 mL, 2 mg/mL) was placed in a 4 mL centrifuge tube, and the acetonitrile stock solution (S/R)-1a (30  $\mu$ L, 3 mM) was injected with a pipetting gun to form the concentration of (S/R)-1a in the mixed solution of 30  $\mu$ M. The cover of the centrifuge tube was covered, and the solution was shaken up and down for 20 times, and then left to age at room temperature (25  $^{\circ}$ C) for 96 h to obtain stable BOPPY assembled microrods. The concentrations from 30 to 100  $\mu$ M and time of chiral BOPPY dyes in the growth solution were tuned to obtain chiral nanocrystals with different sizes and morphologies.

**Synthesis of (S/R)-1b micelles and assembled microrods:** According to the above procedures of (S/R)-1a assemblies, the assembled nanostructures of (S/R)-1b were obtained adopting the same concentrations and time.

### 3. Chiroptical properties in molecular and solid states

#### 3.1 CD and CPL of chiral BOPPYs (R/S)-1a and 1b

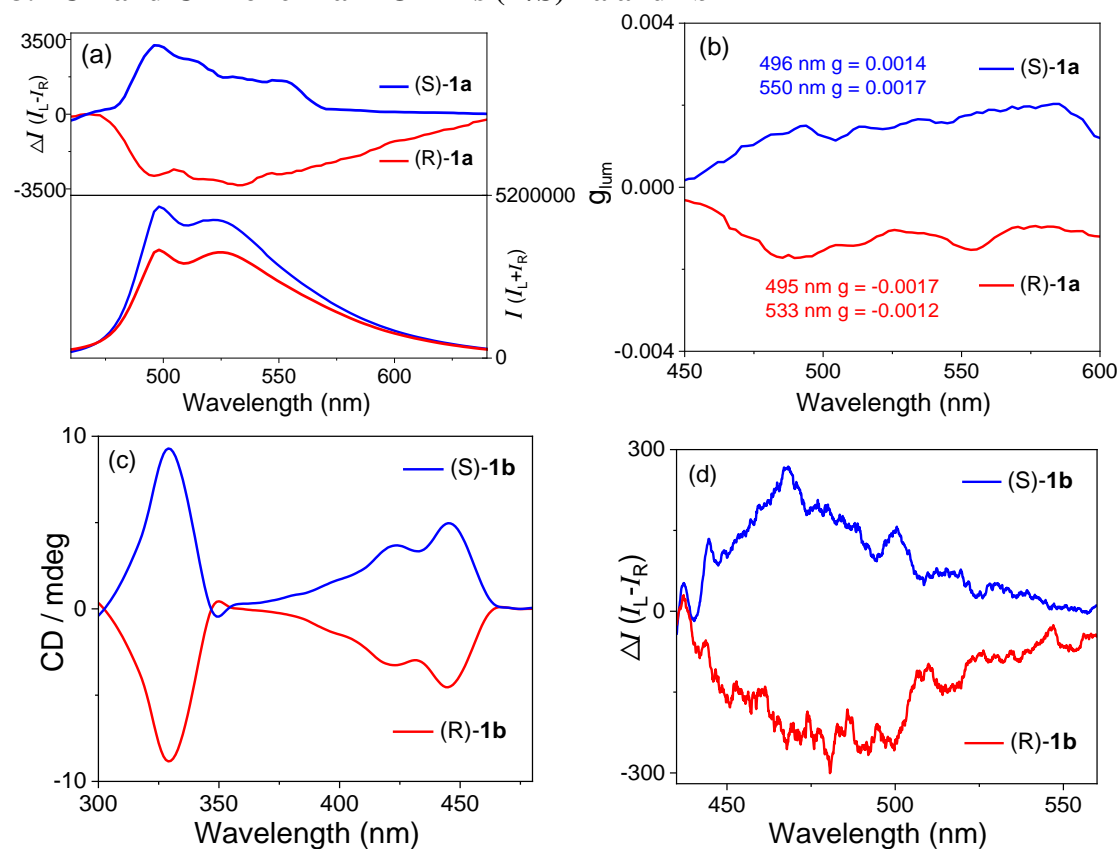

**Figure S1.** CPL and synchronous total luminescence spectra (a) and  $g_{lum}$  (b) of (S/R)-1a at grinding KBr tablets state. CD (c) and CPL (d) spectra of (S/R)-1b in hexane.

**Table S1.** The  $g_{\text{abs}}$  and  $g_{\text{lum}}$  of chiral BOPPYs (S/R)-**1a** and **1b** in hexane.

| dyes           | $\lambda_{\text{max}}/\text{nm}$ ( $g_{\text{abs}}$ )            | $\lambda_{\text{max}}/\text{nm}$ ( $g_{\text{lum}}$ )        |
|----------------|------------------------------------------------------------------|--------------------------------------------------------------|
| (S)- <b>1a</b> | 417 ( $1.397 \times 10^{-4}$ ), 439 ( $1.355 \times 10^{-4}$ )   | 449 ( $1.3 \times 10^{-4}$ ), 479 ( $1.6 \times 10^{-4}$ )   |
| (R)- <b>1a</b> | 417 ( $-1.813 \times 10^{-4}$ ), 439 ( $-1.533 \times 10^{-4}$ ) | 452 ( $-2.3 \times 10^{-4}$ ), 475 ( $-2.4 \times 10^{-4}$ ) |
| (S)- <b>1b</b> | 424 ( $1.045 \times 10^{-4}$ ), 449 ( $9.435 \times 10^{-5}$ )   | 468 ( $2.0 \times 10^{-4}$ )                                 |
| (R)- <b>1b</b> | 424 ( $-1.223 \times 10^{-4}$ ), 449 ( $-1.165 \times 10^{-4}$ ) | 480 ( $-1.1 \times 10^{-4}$ )                                |

### 3.2 Spectroscopic spectra in different solvents

**Table S2.** Photophysical properties of (S/R)-**1a** and **1b** in solvents.

| dyes           | solvents           | $\lambda_{\text{abs}}^{\text{max}}/\text{nm}$ ( $\log \epsilon_{\text{max}}$ ) <sup>a</sup> | $\lambda_{\text{em}}^{\text{max}}$ (nm) | Stokes | $\phi^{\text{b}}$ | $\tau^{\text{c}}$ (ns) |
|----------------|--------------------|---------------------------------------------------------------------------------------------|-----------------------------------------|--------|-------------------|------------------------|
| (S)- <b>1a</b> | hexane             | 414 (4.62), 438 (4.74)                                                                      | 446, 473                                | 3000   | 0.58              | 2.26                   |
|                | toluene            | 416 (4.46), 438 (4.54)                                                                      | 454, 481                                | 3300   | 0.49              | 2.02                   |
|                | DCM                | 416 (4.47), 434 (4.52)                                                                      | 460, 480                                | 3200   | 0.15              | 0.74                   |
|                | THF                | 416 (4.47), 432 (4.52)                                                                      | 460, 480                                | 3200   | 0.07              | 0.37                   |
|                | CH <sub>3</sub> CN | 412 (4.44), 428 (4.46)                                                                      | 488                                     | 3800   | 0.02              | 0.15                   |
| (R)- <b>1a</b> | hexane             | 414 (4.62), 438 (4.74)                                                                      | 447, 474                                | 3100   | 0.65              | 1.94                   |
|                | toluene            | 416 (4.49), 438 (4.57)                                                                      | 455, 480                                | 3200   | 0.53              | 2.07                   |
|                | DCM                | 416 (4.50), 434 (4.54)                                                                      | 461, 482                                | 3300   | 0.17              | 0.73                   |
|                | THF                | 416 (4.50), 432 (4.54)                                                                      | 460, 479                                | 3200   | 0.07              | 0.38                   |
|                | CH <sub>3</sub> CN | 412 (4.45), 428 (4.47)                                                                      | 484                                     | 3400   | 0.02              | 0.14                   |
| (S)- <b>1b</b> | hexane             | 422 (4.41), 446 (4.58)                                                                      | 456, 483                                | 3000   | 0.73              | 2.86                   |
|                | toluene            | 424 (4.54), 448 (4.68)                                                                      | 461, 488                                | 3100   | 0.74              | 2.60                   |
|                | DCM                | 422 (4.54), 444 (4.65)                                                                      | 460, 486                                | 3100   | 0.60              | 2.34                   |
|                | THF                | 422 (4.56), 444 (4.66)                                                                      | 459, 484                                | 3100   | 0.45              | 1.89                   |
|                | CH <sub>3</sub> CN | 418 (4.53), 438 (4.61)                                                                      | 459, 483                                | 3200   | 0.08              | 0.47                   |
| (R)- <b>1b</b> | hexane             | 422 (4.46), 446 (4.67)                                                                      | 456, 482                                | 3000   | 0.70              | 2.87                   |
|                | toluene            | 424 (4.51), 448 (4.65)                                                                      | 461, 487                                | 3100   | 0.64              | 2.61                   |
|                | DCM                | 422 (4.46), 444 (4.57)                                                                      | 460, 486                                | 3100   | 0.51              | 2.36                   |
|                | THF                | 422 (4.48), 444 (4.59)                                                                      | 460, 485                                | 3100   | 0.38              | 1.91                   |
|                | CH <sub>3</sub> CN | 418 (4.48), 438 (4.56)                                                                      | 459, 483                                | 3200   | 0.08              | 0.48                   |

<sup>a</sup>Molar absorption coefficients are in the maximum of the highest peak. <sup>b</sup>Absolute  $\Phi_{\text{FS}}$  for chiral BOPPYs **1a** and **1b** were measured using integrating sphere in different solvents (excited at 410 nm for **1a** and **1b**).



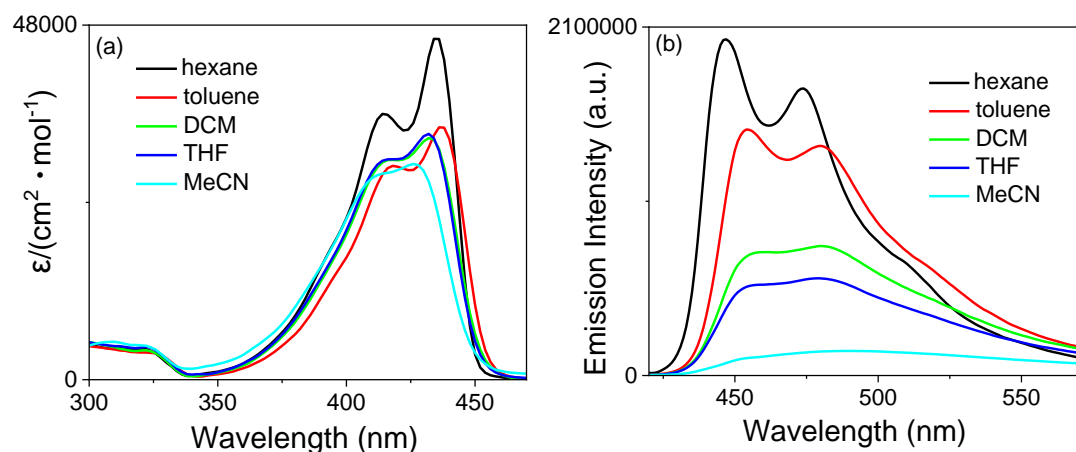

**Figure S2.** Absorption (a) and fluorescence (b) spectra of (S)-1a (10  $\mu\text{M}$ ) in hexane, toluene, dichloromethane, tetrahydrofuran and acetonitrile, excited at 410 nm.

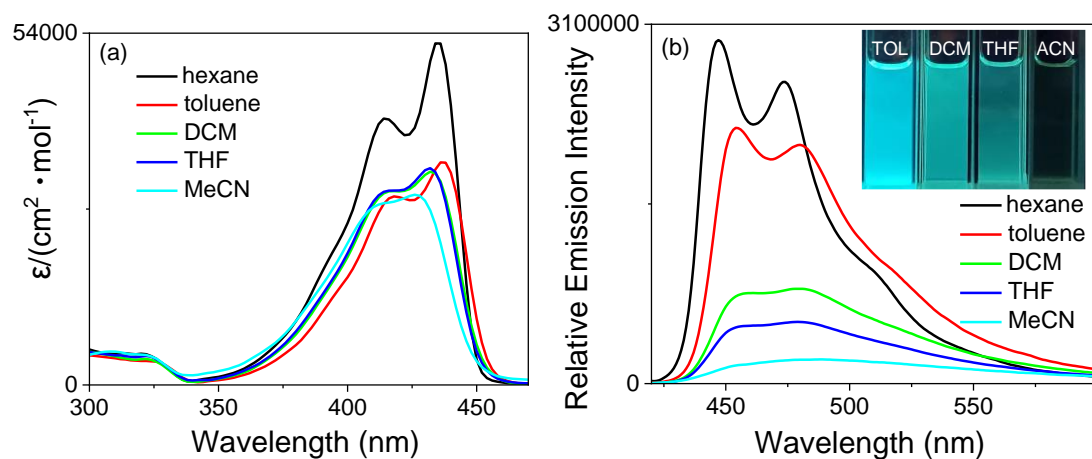

**Figure S3.** Absorption (a) and fluorescence (b) spectra of (R)-1a (10  $\mu\text{M}$ ) in hexane, toluene, dichloromethane, tetrahydrofuran and acetonitrile, excited at 410 nm.

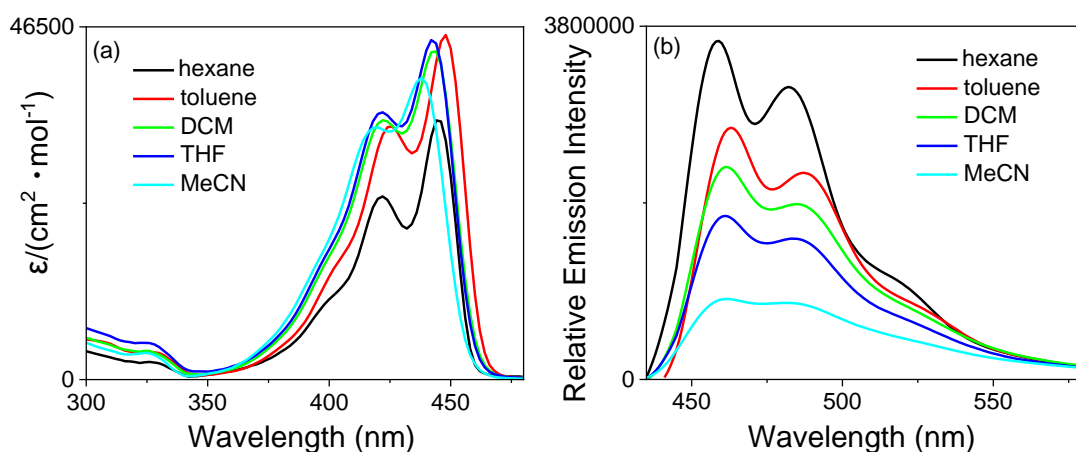

**Figure S4.** Absorption (a) and fluorescence (b) spectra of (S)-1b (10  $\mu\text{M}$ ) in hexane, toluene, dichloromethane, tetrahydrofuran and acetonitrile, excited at 415 nm.

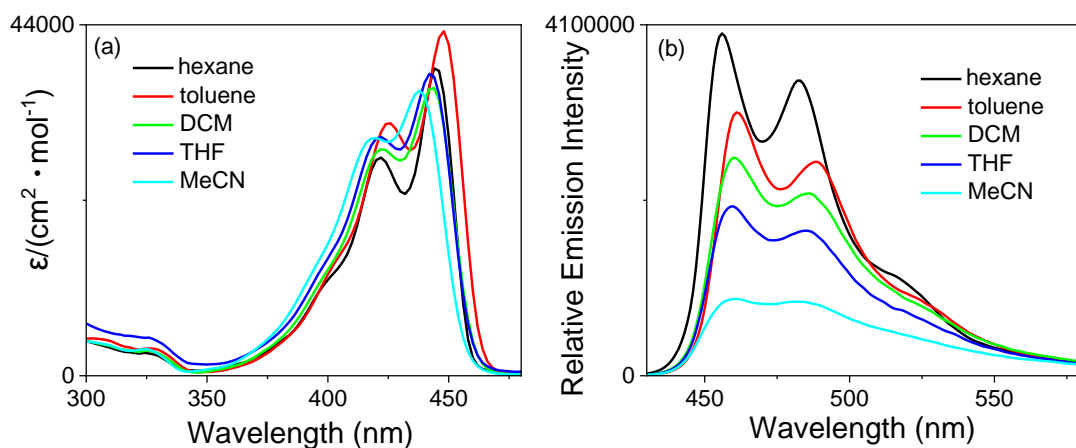

**Figure S5.** Absorption (a) and fluorescence (b) spectra of (R)-1b (10  $\mu\text{M}$ ) in hexane, toluene, dichloromethane, tetrahydrofuran and acetonitrile, excited at 415 nm.

### 3.2 Thermostability of chiral BOPPY 1a

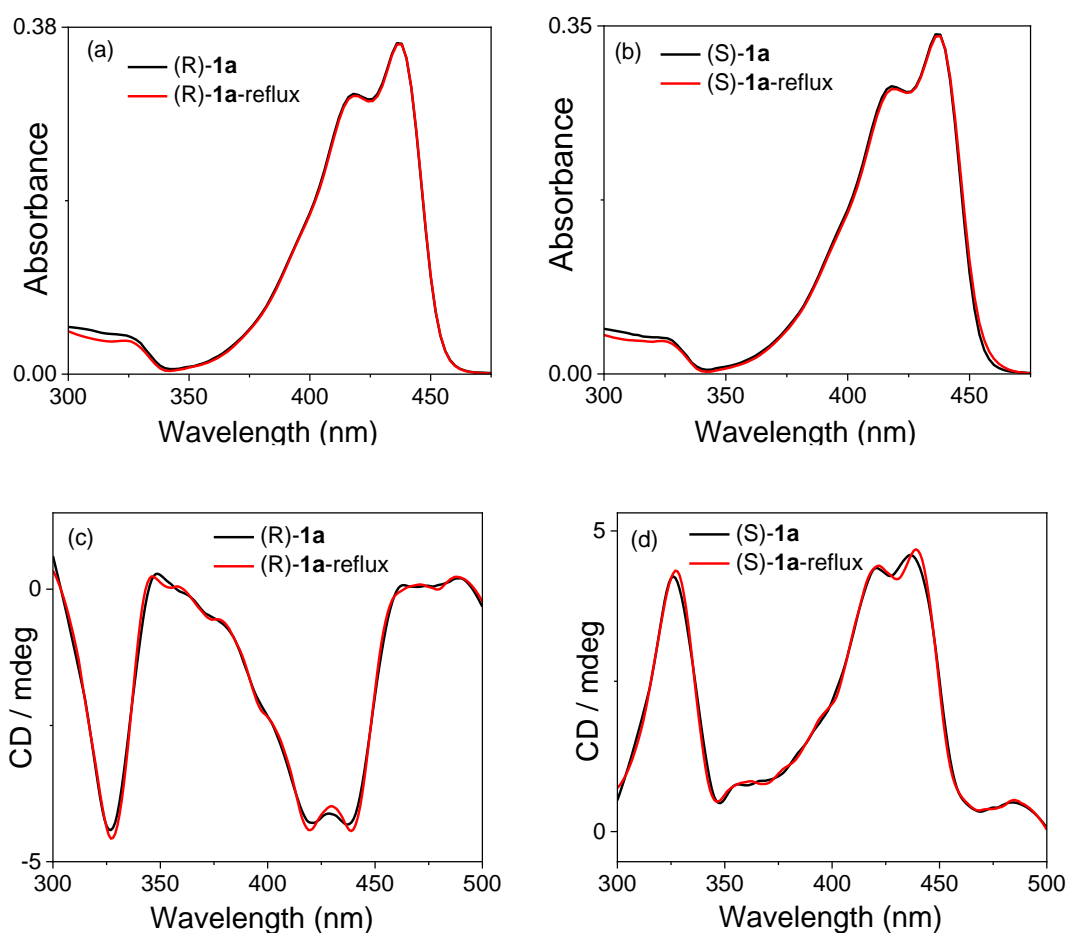

**Figure S6.** Absorption spectra (a, b) and the corresponding CD spectra (c, d) of (R/S)-1a (10  $\mu\text{M}$ ) before and after refluxing in toluene solution for 12 h.

### 3.3 Spectroscopic spectra of chiral BOPPYs (R/S)-1a and 1b in solid states

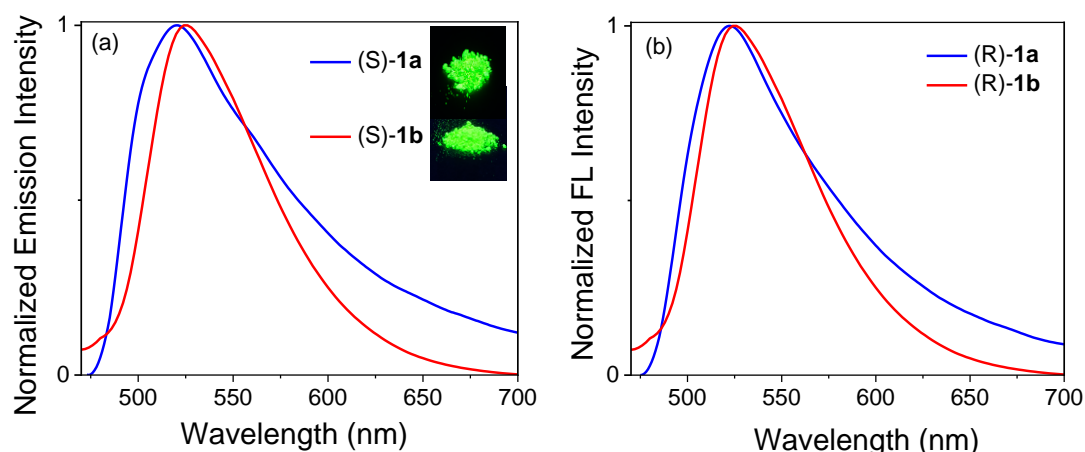

**Figure S7.** Emission spectra of (S/R)-**1a** and **1b** in the solid state, excited at 450 nm.

**Table S3.** Photophysical properties of (R/S)-**1a** and **1b** in solid states.

| dyes           | $\lambda_{em}^{max}$ (nm) <sup>a</sup> | $\phi^b$ | $\tau^c$ (ns) |
|----------------|----------------------------------------|----------|---------------|
| (R)- <b>1a</b> | 522                                    | 0.29     | 1.56          |
| (S)- <b>1a</b> | 520                                    | 0.15     | 0.88          |
| (R)- <b>1b</b> | 526                                    | 0.27     | 2.35          |
| (S)- <b>1b</b> | 526                                    | 0.18     | 1.28          |

<sup>a</sup>Molar absorption coefficients are in the maximum of the highest peak. <sup>b</sup>Absolute fluorescence quantum yields for chiral BOPPYs **1a** and **1b** were measured using integrating sphere in different solvents (excited at 450 nm for **1a** and **1b**). All  $\phi_f$  values are corrected for changes in refractive indexes of different solvents.

### 3.4 Viscosity-induced emission enhancement

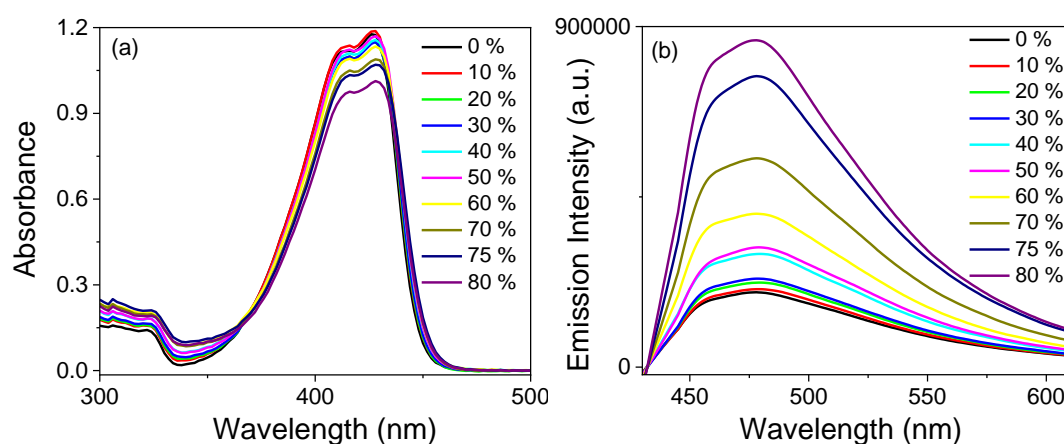

**Figure S8.** The absorbance (a) and emission spectra (b) of (S)-**1a** (30  $\mu$ M) in methanol-glycerol mixture with different viscosity, excited at 410 nm.

**Table S4.** Photophysical properties of (S)-**1a** in methanol-glycerol mixture.

| solvents     | $\lambda_{abs}^{max}/nm$ ( $\log \epsilon_{max}$ ) | $\lambda_{em}^{max}$ (nm) | $\phi$ | $\tau$ (ns) |
|--------------|----------------------------------------------------|---------------------------|--------|-------------|
| methanol     | 416 (4.57), 426 (4.59)                             | 477                       | 0.02   | 0.08        |
| 80% glycerol | 415 (4.51), 428 (4.53)                             | 479                       | 0.09   | 0.38        |

## 4. AIE properties

**Table S5.** AIE properties of (R/S)-**1a** and **1b** in di-water system.

| dyes           | $\lambda_{\text{abs}}^{\text{max}}/\text{nm}(\log \epsilon_{\text{max}})^{\text{a}}$ | $\lambda_{\text{em}}^{\text{max}}(\text{nm})$ | $\phi^{\text{b}}$ | $\tau^{\text{c}}(\text{ns})$ |
|----------------|--------------------------------------------------------------------------------------|-----------------------------------------------|-------------------|------------------------------|
| (S)- <b>1a</b> | 417 (4.41), 443 (4.47)                                                               | 473, 515                                      | 0.12              | 2.12                         |
| (R)- <b>1a</b> | 415 (4.44), 441 (4.47)                                                               | 473, 495                                      | 0.09              | 0.94                         |
| (S)- <b>1b</b> | 424 (4.47), 452 (4.51)                                                               | 476, 501                                      | 0.07              | 1.01                         |
| (R)- <b>1b</b> | 424 (4.57), 451 (4.60)                                                               | 477, 520                                      | 0.10              | 1.99                         |

<sup>a</sup>Molar absorption coefficients are in the maximum of the highest peak. <sup>b</sup>Absolute  $\Phi_{\text{FS}}$  for **1a** and **1b** were measured using integrating sphere in different solvents (excited at 410 nm for **1a** and **1b**).

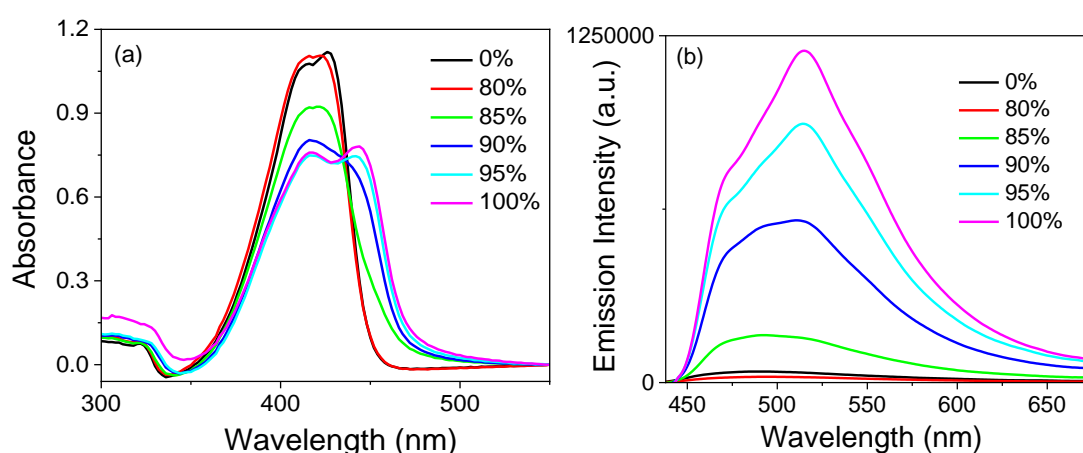

**Figure S9.** Absorption spectra (a) and relative FL intensity (b) of (S)-**1a** (30  $\mu\text{M}$ ) in acetonitrile/ di-water system with different di-water content ratios, excited at 410 nm.

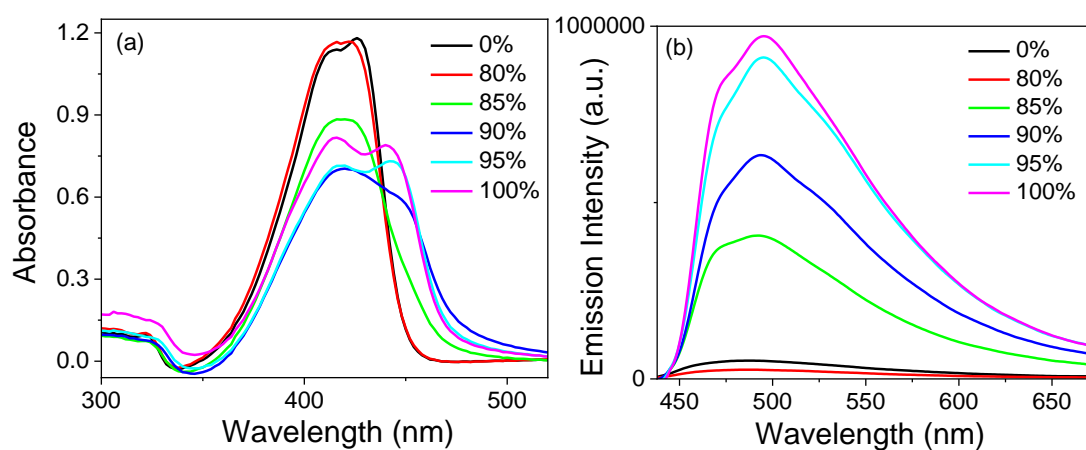

**Figure S10.** Absorption spectra (a) and relative FL intensity (b) of (R)-**1a** (30  $\mu\text{M}$ ) in acetonitrile/di-water system with different di-water content ratios, excited at 410 nm.

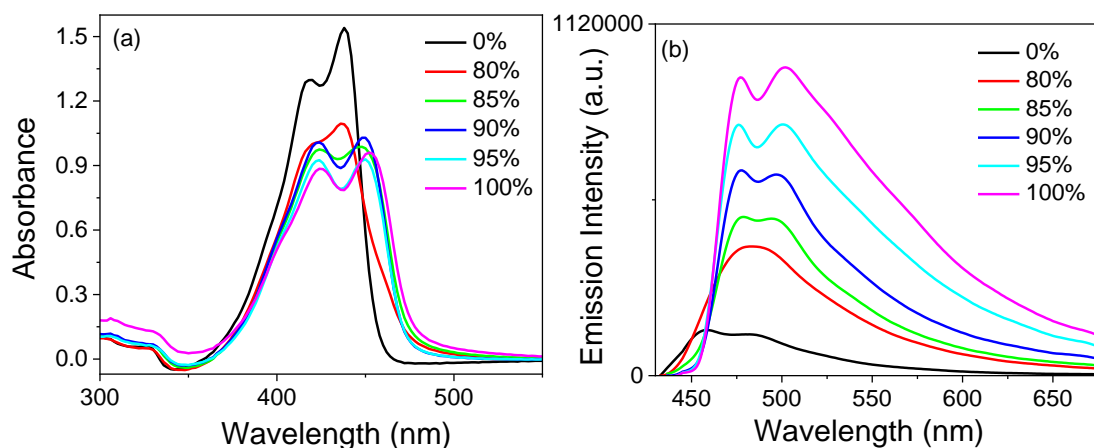

**Figure S11.** Absorption spectra (a) and relative FL intensity (b) of (S)-**1b** (30  $\mu$ M) in acetonitrile/di-water system with different di-water content ratios, excited at 410 nm.

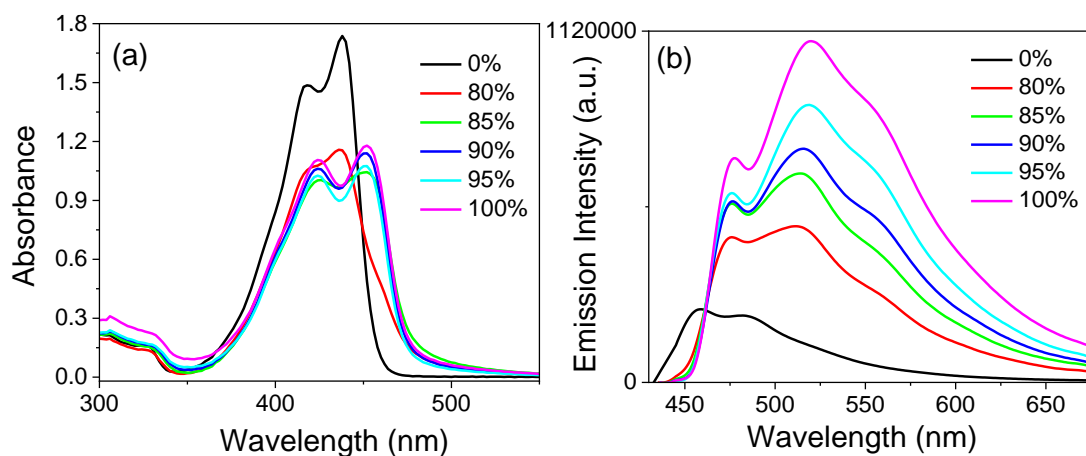

**Figure S12.** Absorption spectra (a) and relative FL Intensity (b) of (R)-**1b** (30  $\mu$ M) in acetonitrile and di-water system with different di-water content ratios, excited at 410 nm.

## 5. Chiroptical properties in micelles and aggregation state

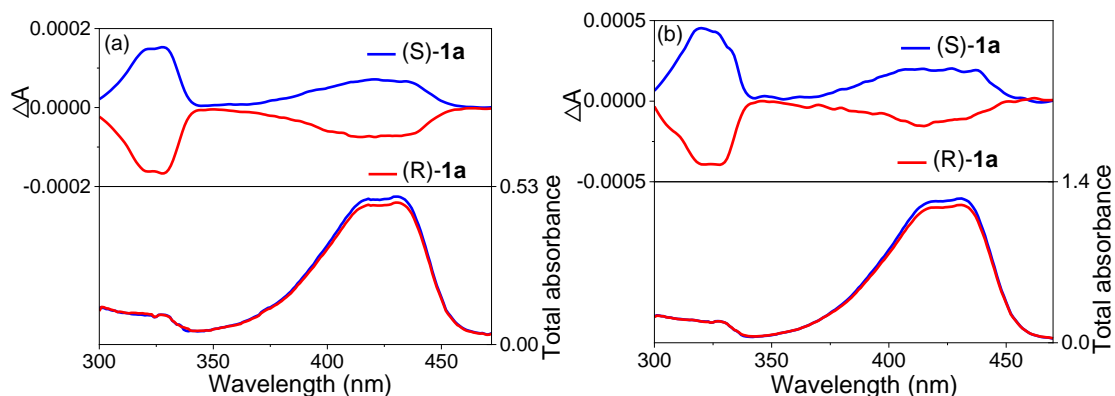

**Figure S13.** The CD and synchronous absorption spectra of BOPPY (S/R)-**1a** at 10  $\mu$ M (a) and 30  $\mu$ M (b).

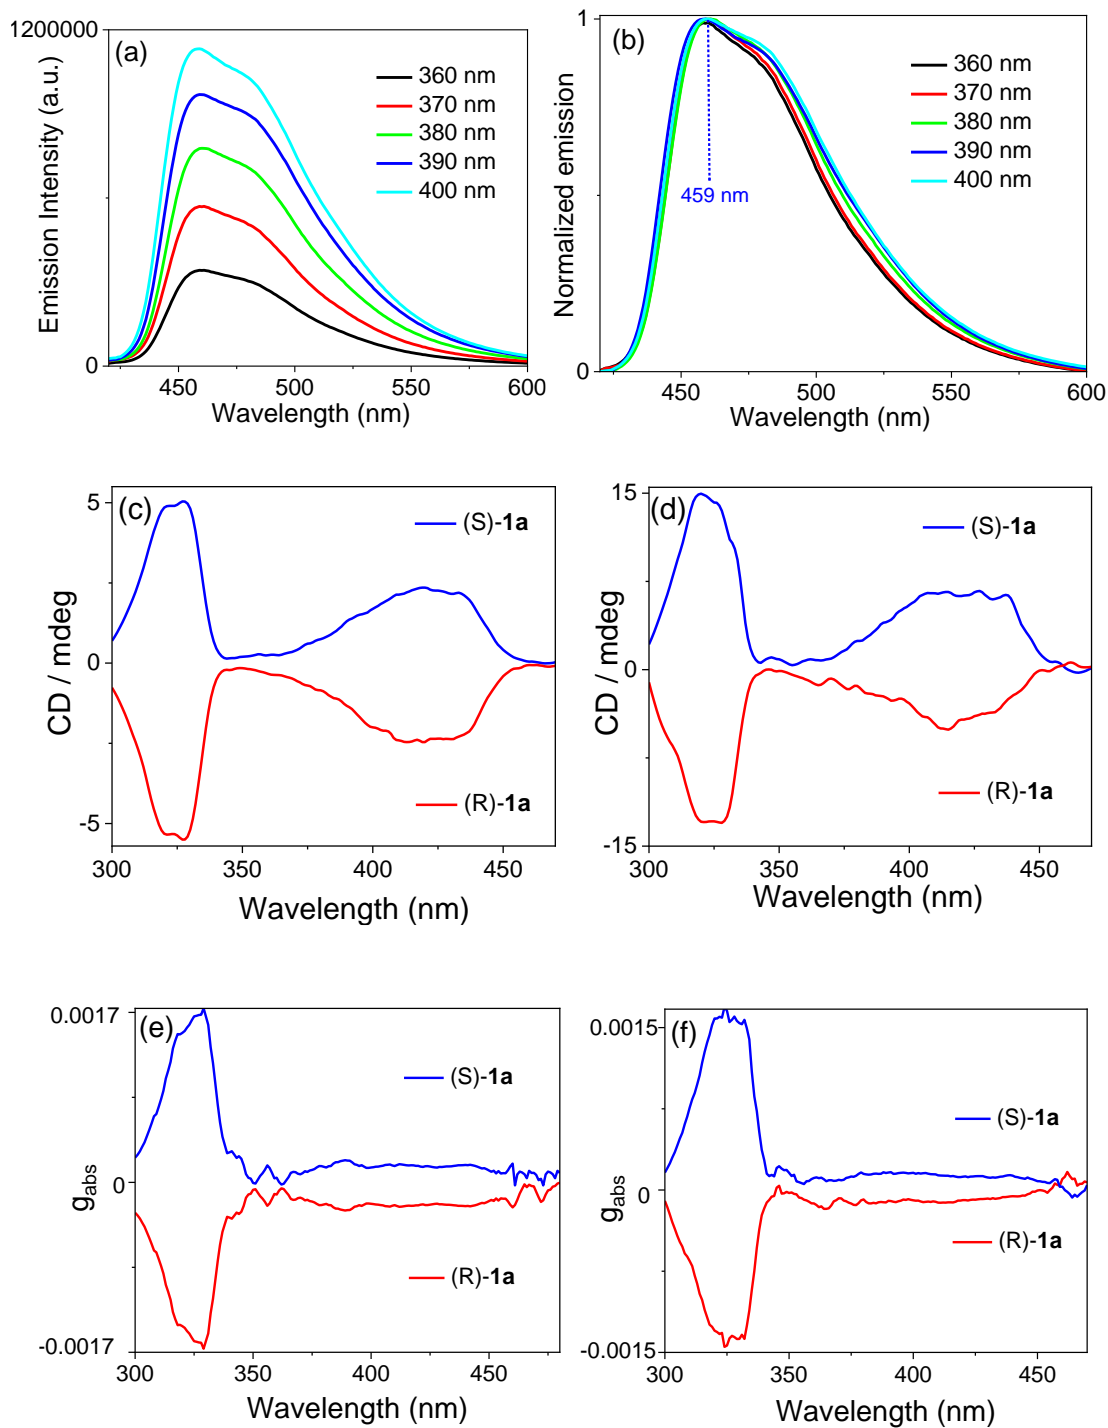

**Figure S14.** (a, b) The emission and normalized emission spectra of (S)-**1a** in the micelle states excited at 360, 370, 380, 390 and 400 nm. CD (c), synchronous  $g_{abs}$  (e) spectra of BOPPY (S/R)-**1a** (10  $\mu$ M) in SDS aqueous solution at the stable state. The CD (d), synchronous  $g_{abs}$  (f) spectra of BOPPY (S/R)-**1a** (30  $\mu$ M) in SDS aqueous solution at the initial state.

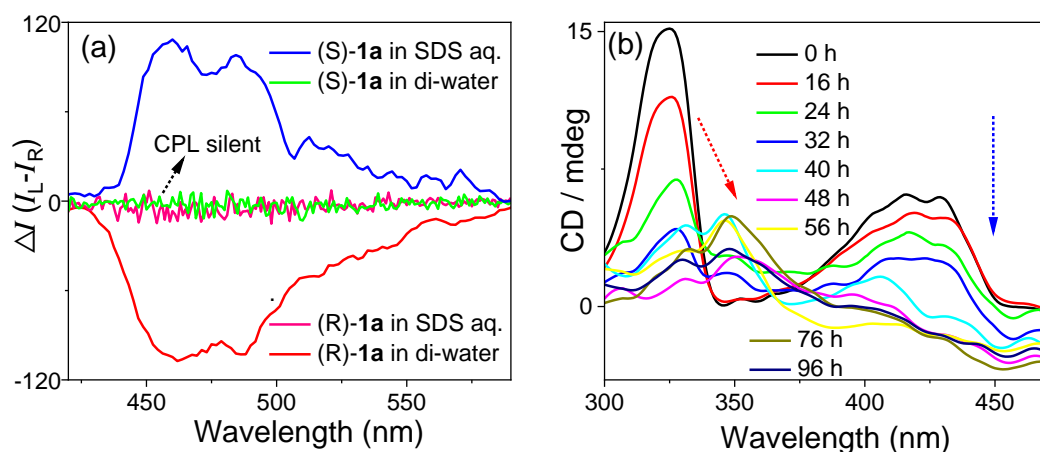

**Figure S15.** (a) The CPL spectra of BOPPY (S/R)-**1a** (30  $\mu\text{M}$ ) in di-water and SDS aqueous solution at the initial stage. (b) The CD spectra of (S)-**1a** (30  $\mu\text{M}$ ) in different times ranging from 0 to 96 h in SDS aqueous solution.

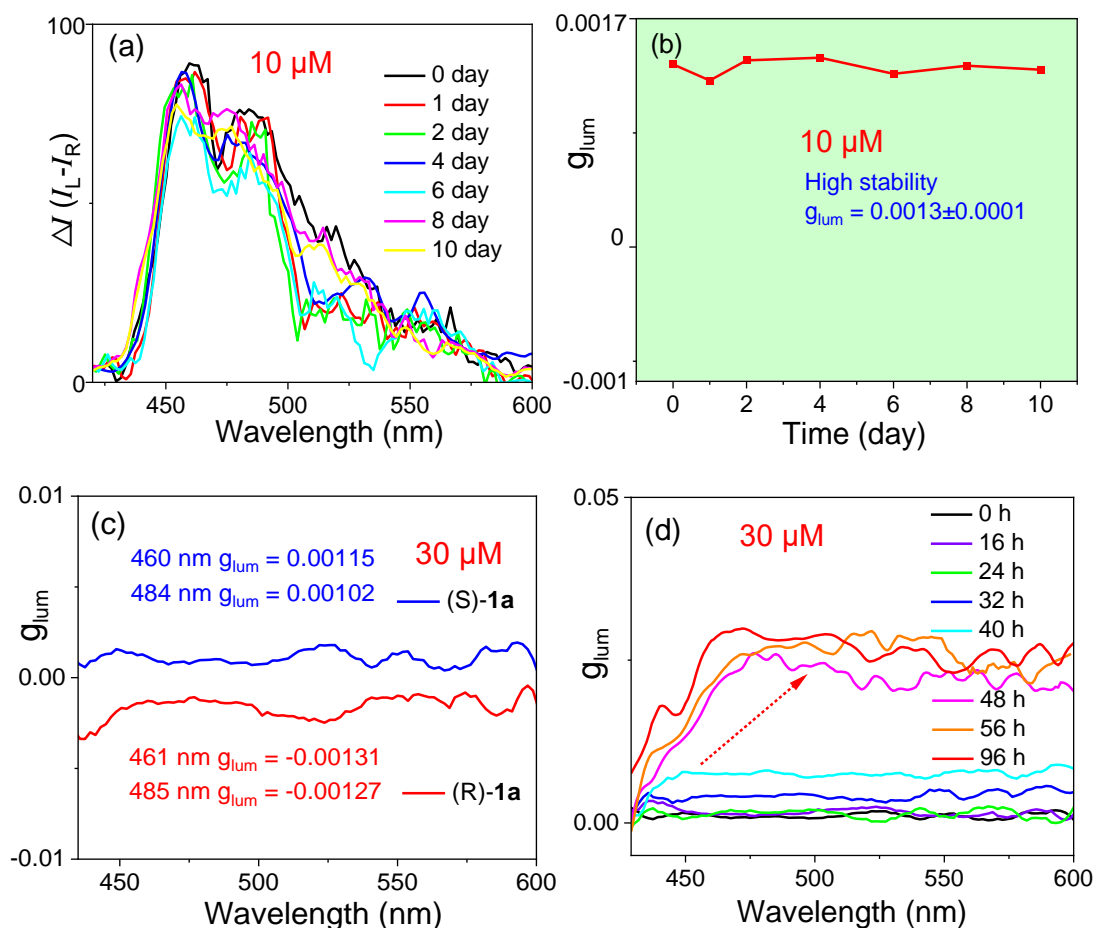

**Figure S16.** The stability study of CPL spectra of (S)-**1a** (10  $\mu\text{M}$ ) in SDS aqueous solution at different days and (b) the corresponding  $g_{\text{lum}}$  change plot. (c) The  $g_{\text{lum}}$  spectra of (S/R)-**1a** (30  $\mu\text{M}$ ) in SDS aqueous solution at the initial state. (d) The  $g_{\text{lum}}$  spectra of (S)-**1a** (30  $\mu\text{M}$ ) in different times ranging from 0 to 96 h in SDS aqueous solution.

**Table S6.** The  $g_{abs}$  of chiral BOPPY **1a** in SDS aqueous solution.

| dyes           | $\lambda_{max}/nm$ ( $g_{abs}$ , 10 $\mu M$ , stable state)    | $\lambda_{max}/nm$ ( $g_{abs}$ , 30 $\mu M$ , initial state)   |
|----------------|----------------------------------------------------------------|----------------------------------------------------------------|
| (S)- <b>1a</b> | 418 ( $1.70 \times 10^{-4}$ ), 433 ( $1.59 \times 10^{-4}$ )   | 414 ( $1.32 \times 10^{-4}$ ), 436 ( $1.25 \times 10^{-4}$ )   |
| (R)- <b>1a</b> | 414 ( $-2.39 \times 10^{-4}$ ), 431 ( $-2.22 \times 10^{-4}$ ) | 415 ( $-1.70 \times 10^{-4}$ ), 431 ( $-1.59 \times 10^{-4}$ ) |

**Table S7.** The  $g_{lum}$  of chiral BOPPY **1a** in SDS aqueous solution in the steady state.

| dyes           | $\lambda_{max}/nm$ ( $g_{lum}$ , 10 $\mu M$ ) | $\lambda_{max}/nm$ ( $g_{lum}$ , 30 $\mu M$ ) |
|----------------|-----------------------------------------------|-----------------------------------------------|
| (S)- <b>1a</b> | 459 (0.00136), 480 (0.00114)                  | 495 (0.0283)                                  |
| (R)- <b>1a</b> | 459 (-0.00137), 480 (-0.00122)                | 495 (-0.0251)                                 |

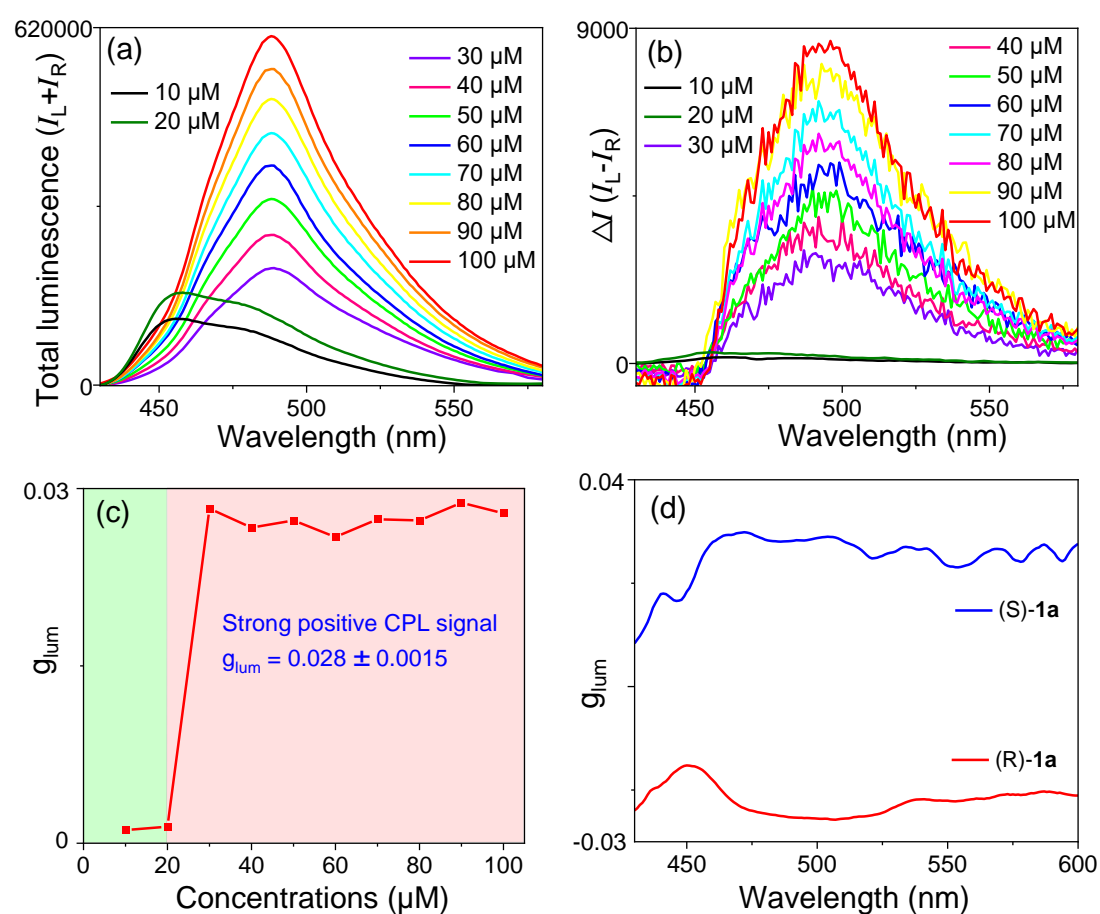**Figure S17.** The CPL spectra (a), emission spectra (b) and  $g_{lum}$  line chart (c) of BOPPY (S)-**1a** in different concentrations ranging from 10 to 100  $\mu M$  in SDS aqueous solution test after 5 days of stability. The  $g_{lum}$  (d) spectra of final (S/R)-**1a** assembly under the same conditions in SDS aqueous solution.



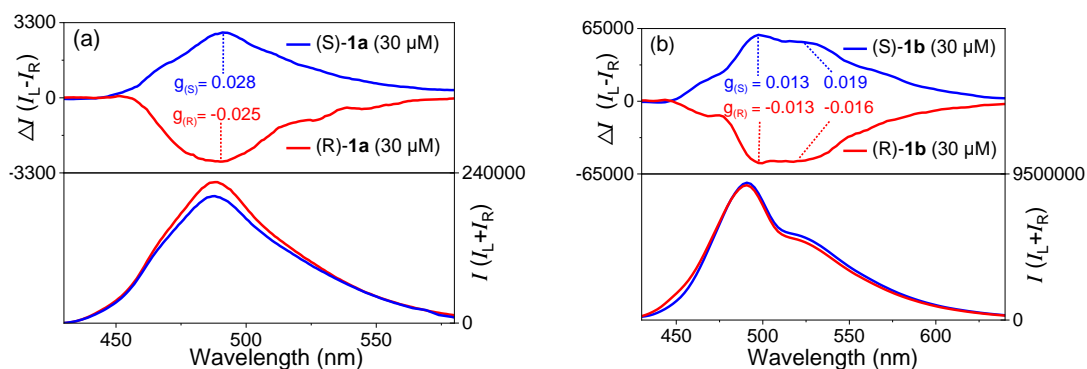

**Figure S18** The CPL and synchronous total luminescence spectra of BOPPY (S/R)-1a (a) and 1b (b) at 30 μM at the steady state in SDS aqueous solution.

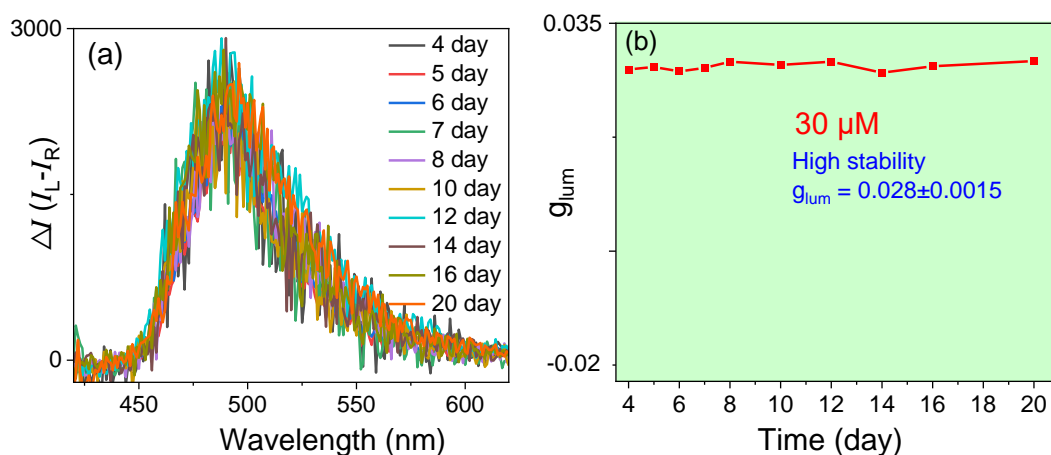

**Figure S19.** The stability study of CPL spectra (a) and  $g_{lum}$  change plot (b) of (S)-1a (30 μM) in SDS aqueous solution at different days.

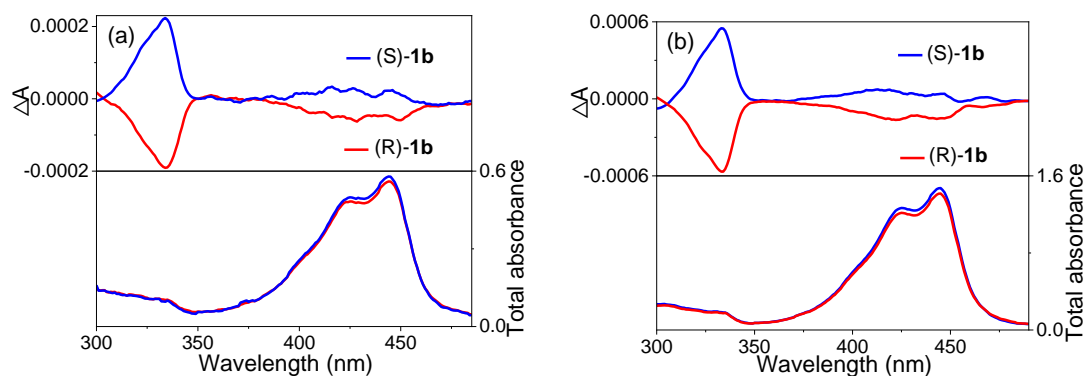

**Figure S20.** The CD and synchronous absorption spectra of BOPPY (S/R)-1b at 10 μM (a) and 30 μM (b).

**Table S8.** Stability study on every other day on (S)-1a (30 μM) in SDS aqueous solution.

|           |        |        |        |        |        |
|-----------|--------|--------|--------|--------|--------|
| day       | 4      | 5      | 6      | 7      | 8      |
| $g_{lum}$ | 0.0279 | 0.0283 | 0.0276 | 0.0281 | 0.0291 |
| day       | 10     | 12     | 14     | 16     | 20     |
| $g_{lum}$ | 0.0286 | 0.0291 | 0.0274 | 0.0284 | 0.0292 |

**Table S9.** The  $g_{abs}$  of chiral BOPPYs **1b** in SDS aqueous solution.

| dyes           | $\lambda_{max}/nm$ ( $g_{abs}$ , 10 $\mu M$ , stable state)    | $\lambda_{max}/nm$ ( $g_{abs}$ , 30 $\mu M$ , initial state)  |
|----------------|----------------------------------------------------------------|---------------------------------------------------------------|
| (S)- <b>1b</b> | 416 ( $1.02 \times 10^{-4}$ ), 446 ( $8.2 \times 10^{-5}$ )    | 425 ( $1.08 \times 10^{-4}$ ), 445 ( $1.01 \times 10^{-4}$ )  |
| (R)- <b>1b</b> | 421 ( $-1.33 \times 10^{-4}$ ), 446 ( $-1.04 \times 10^{-4}$ ) | 423 ( $-1.18 \times 10^{-4}$ ), 441 ( $-8.8 \times 10^{-5}$ ) |

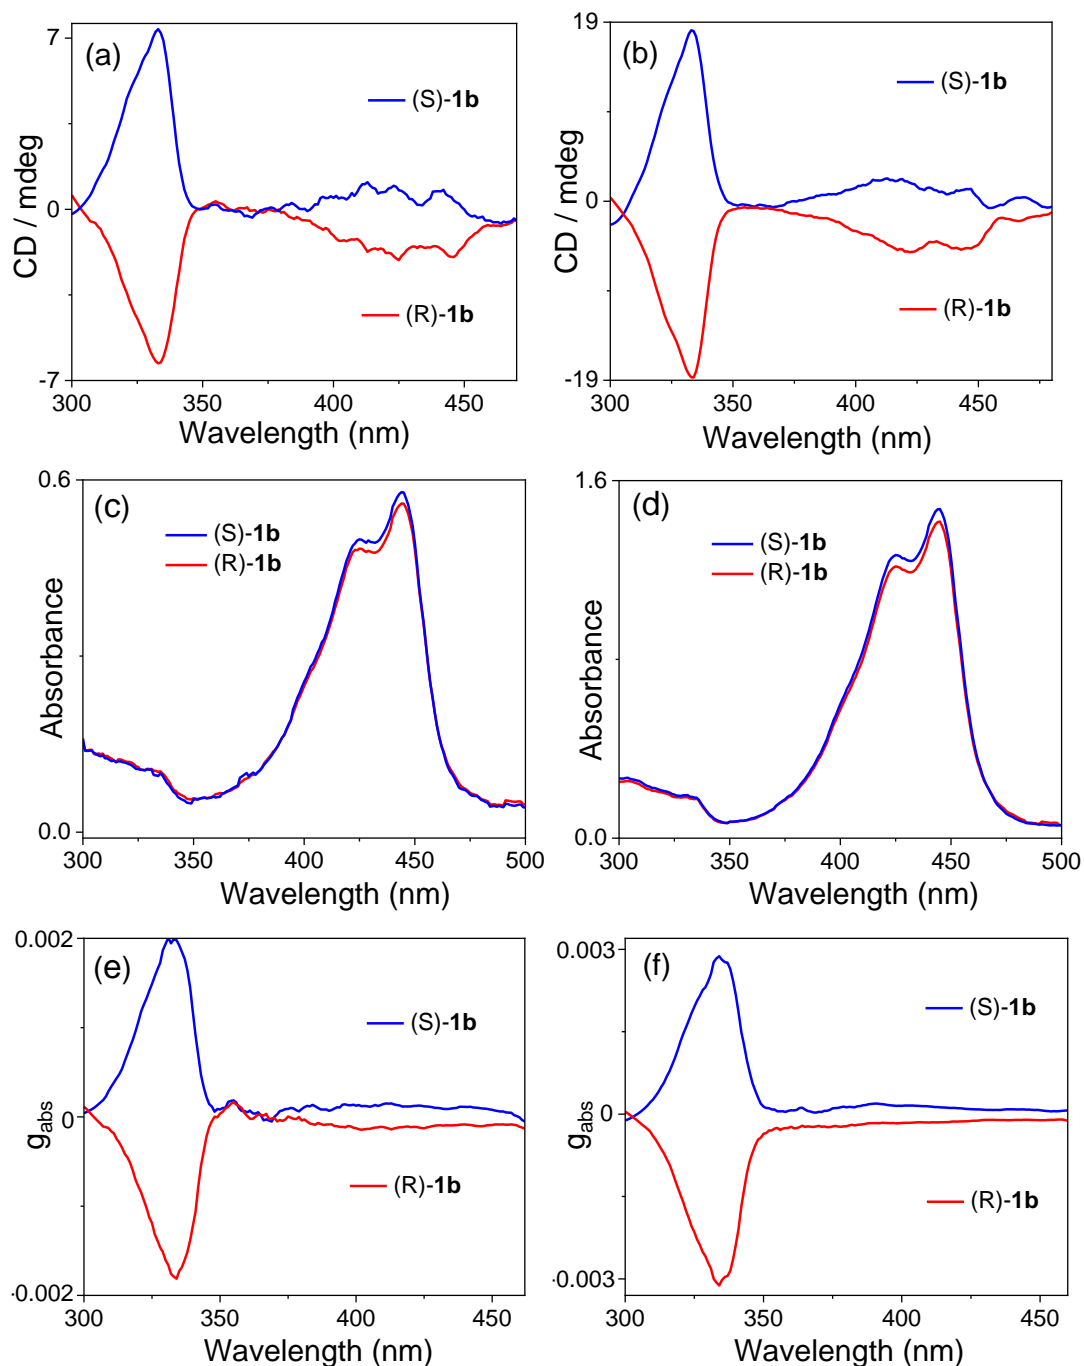**Figure S21.** The CD (a), synchronous absorption (c) and  $g_{abs}$  (e) spectra of BOPPY (S/R)-**1b** (10  $\mu M$ ) in SDS aqueous solution at the stable state. The CD (b), synchronous absorption (d) and  $g_{abs}$  (f) spectra of BOPPY (S/R)-**1b** (30  $\mu M$ ) in SDS aqueous solution at the initial state.

**Table S10.** The  $g_{lum}$  of chiral BOPPYs **1b** in SDS aqueous solution at the stable state.

| dyes           | $\lambda_{max}/nm$ ( $g_{lum}$ , 10 $\mu M$ ) | $\lambda_{max}/nm$ ( $g_{lum}$ , 30 $\mu M$ ) |
|----------------|-----------------------------------------------|-----------------------------------------------|
| (S)- <b>1b</b> | 457 (0.00142), 480 (0.00140)                  | 498 (0.01322), 528 (0.01862)                  |
| (R)- <b>1b</b> | 460 (-0.00169), 480 (-0.00151)                | 498 (-0.01274), 526 (-0.0157)                 |

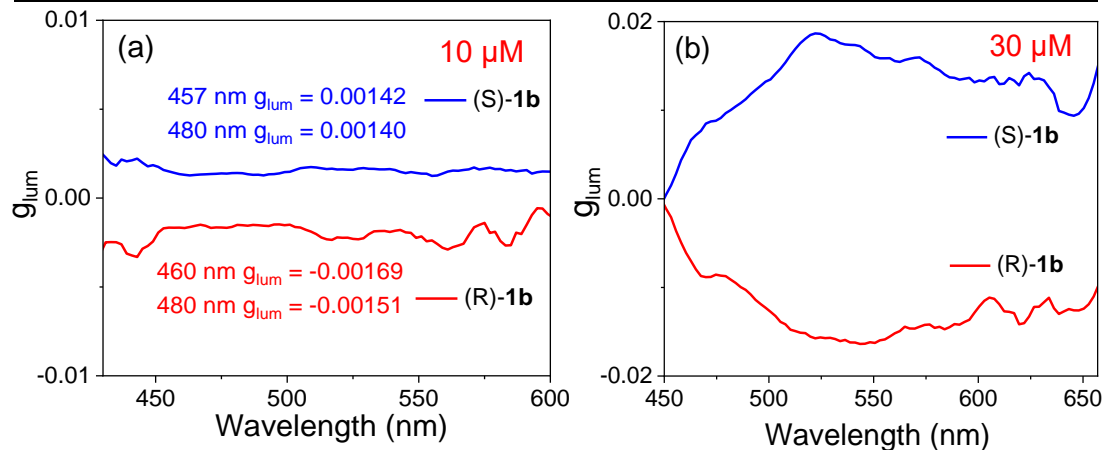

**Figure S22.** The  $g_{lum}$  spectra of (S/R)-**1b** in 10  $\mu M$  (a) and 30  $\mu M$  (b) at the steady state in SDS aqueous solution.

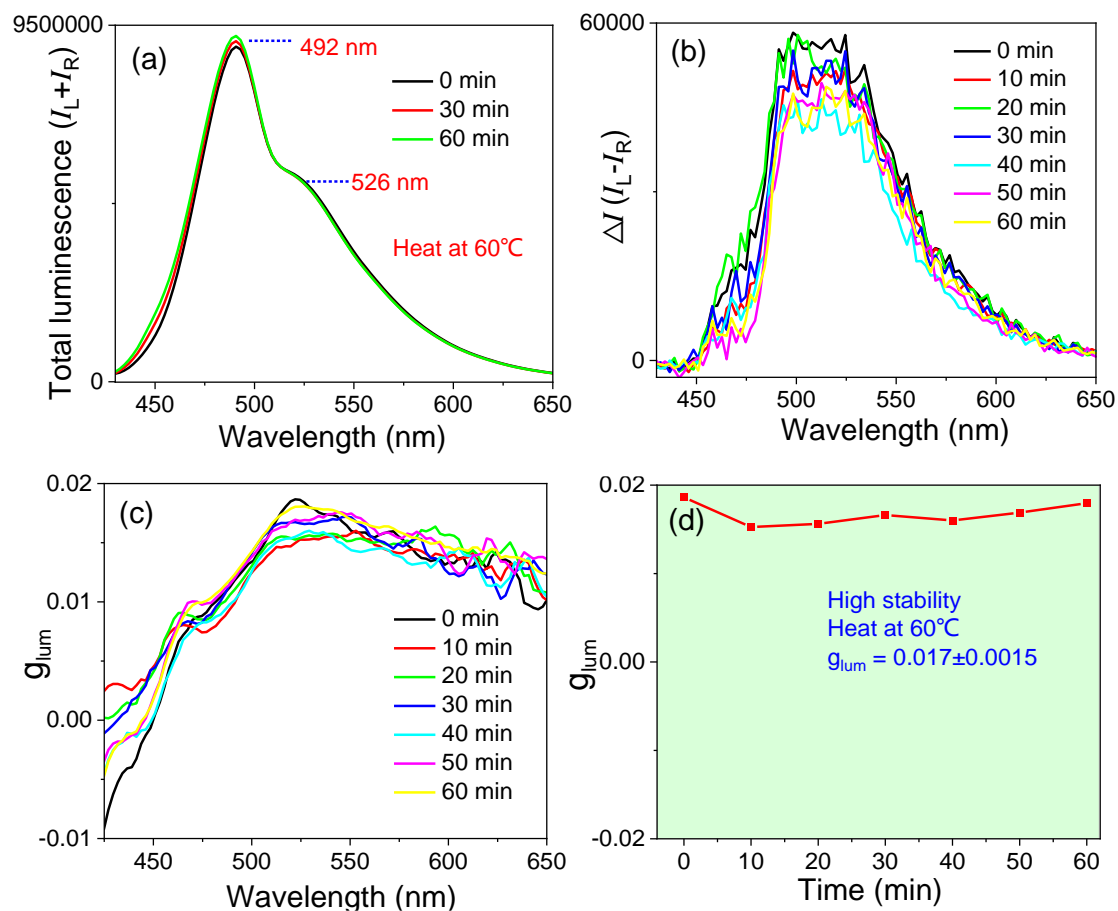

**Figure S23.** The total luminescence (a), CPL (b),  $g_{lum}$  (c) spectra and  $g_{lum}$  (monitoring at 528 nm) change plot (d) of (S)-**1b** (30  $\mu M$ ) in SDS aqueous solution in the final steady state heating at 60 °C ten minutes ultrasonic 30 s to study stability.

## 6. Helical single crystal packing diagrams

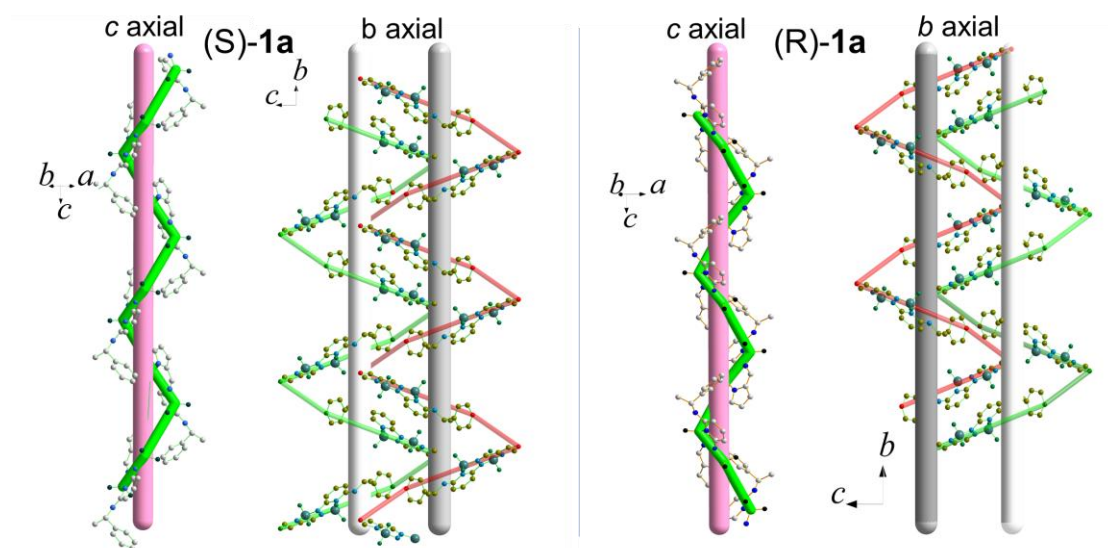

**Figure S24.** Single-crystal packing plots at the “c” axial direction revealing the formation of helical aggregates P-helix from (S)-**1a** and M-helix from (R)-**1a**. Single-crystal packing plots at the “b” axial direction revealing the formation of double helical aggregates from (S)-**1a** and (R)-**1a**.

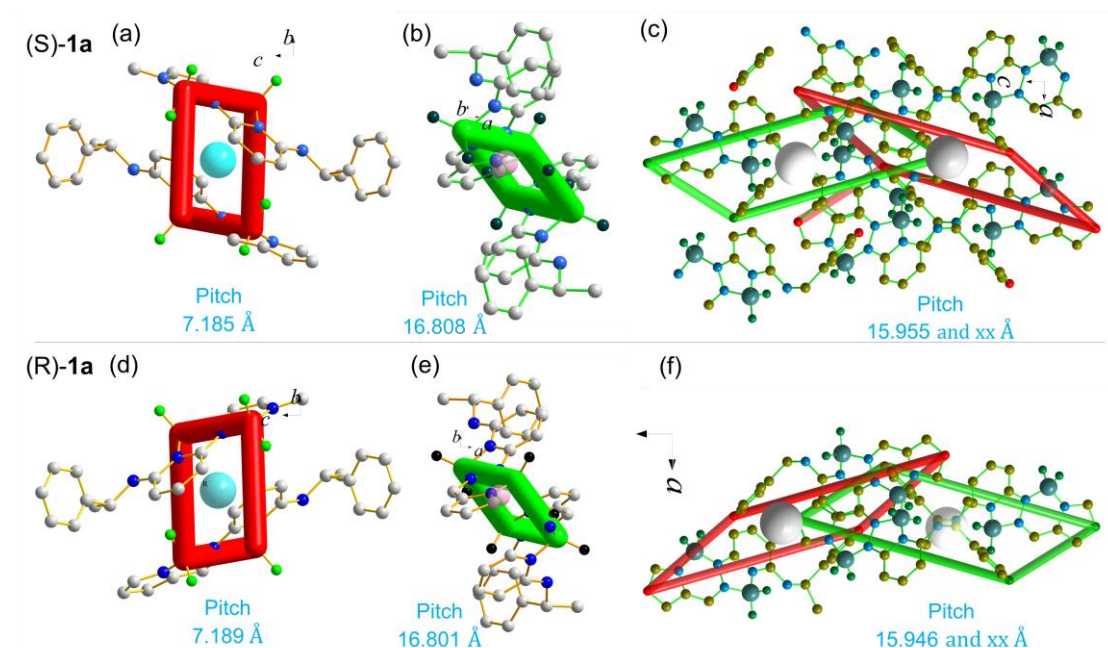

**Figure S25.** (a-c) Single-crystal packing helical distance at the “a”, “c” and “b” axial directions from the corresponding helix from (S)-**1a**, respectively. (d-f) Single-crystal packing helical distance at the “a”, “c” and “b” axial directions from the corresponding helix from (R)-**1a**, respectively.

## 7. SEM and TEM

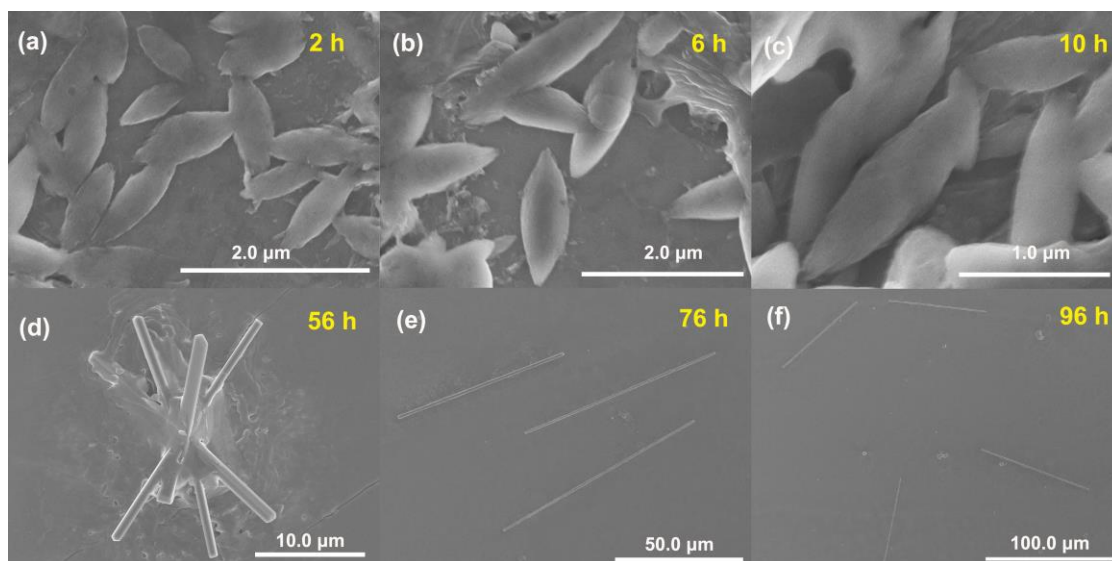

**Figure S26.** Time-dependent SEM images visualizing the self-assembly processes of (S)-1a (30 μM) in SDS aqueous solution under different time.

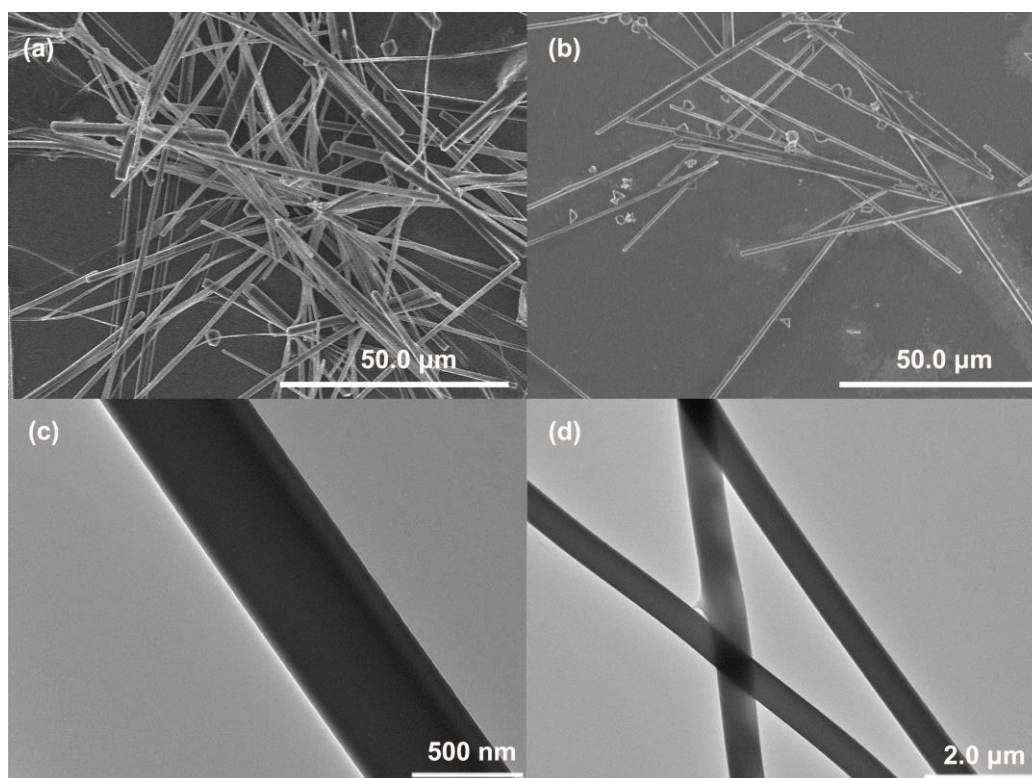

**Figure S27.** The SEM images of (S)-1a (a) and (R)-1a (b) in SDS aqueous solution after 96 h. The TEM images of (S)-1a (c) and (R)-1a (d) in SDS water after 96 h.

## 8. HPLC measurements for new Chiral BOPPY Dyes

HPLC analysis: (S)-1a

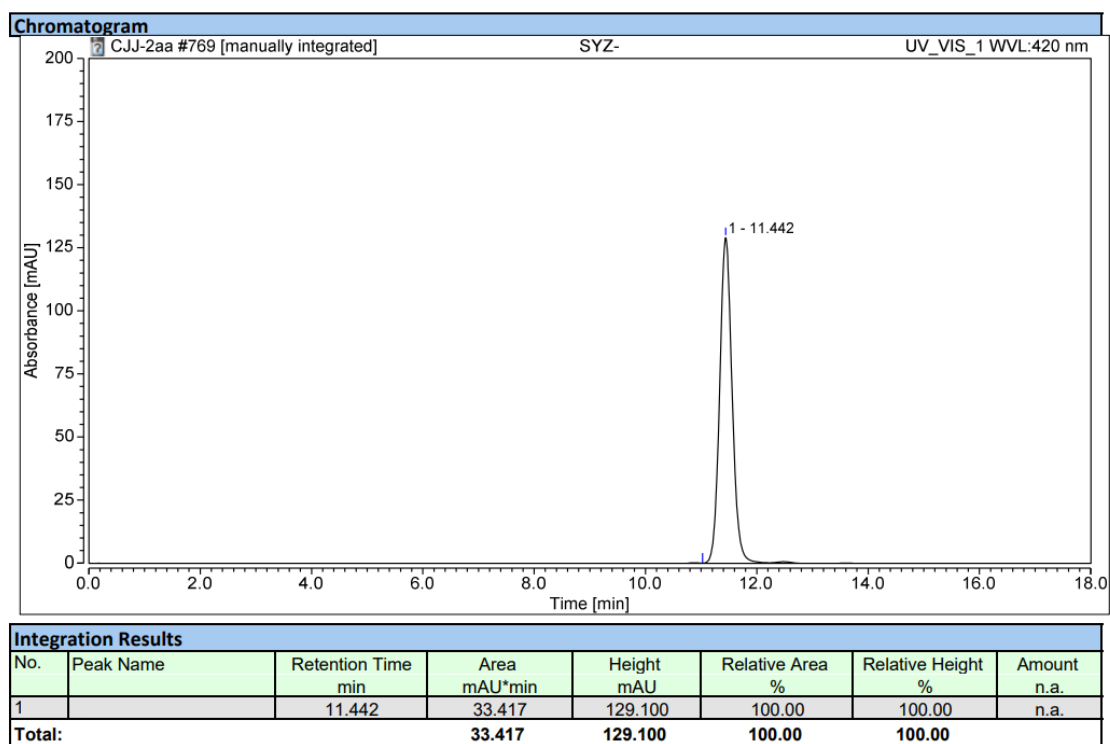

HPLC analysis: (R)-1a

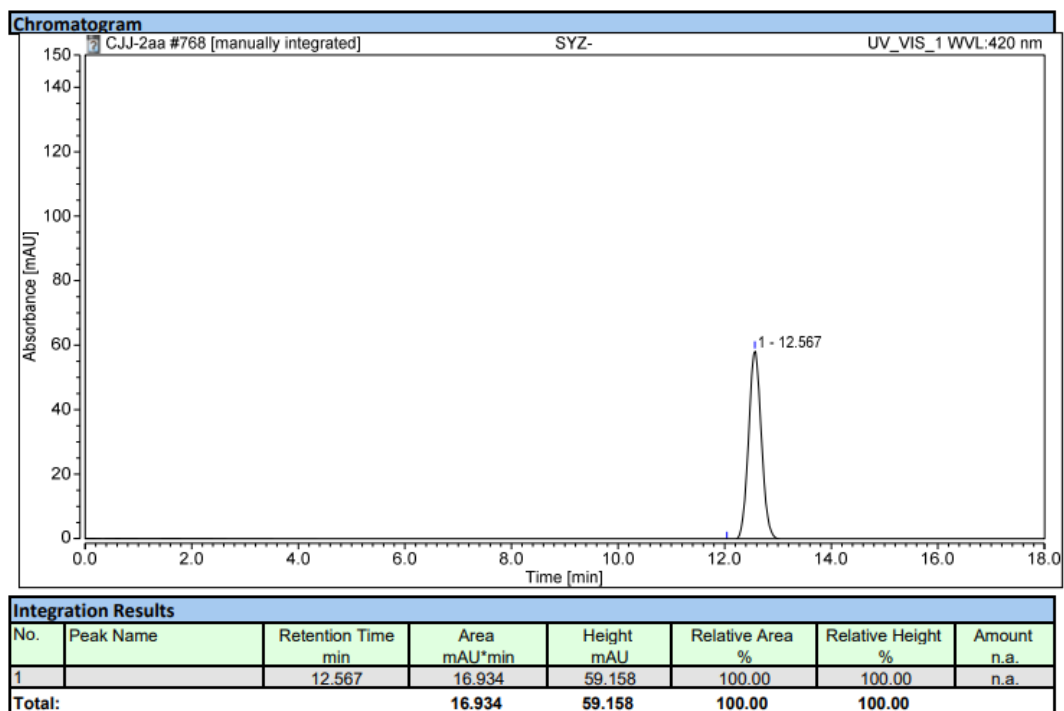

HPLC analysis: (S)-1b

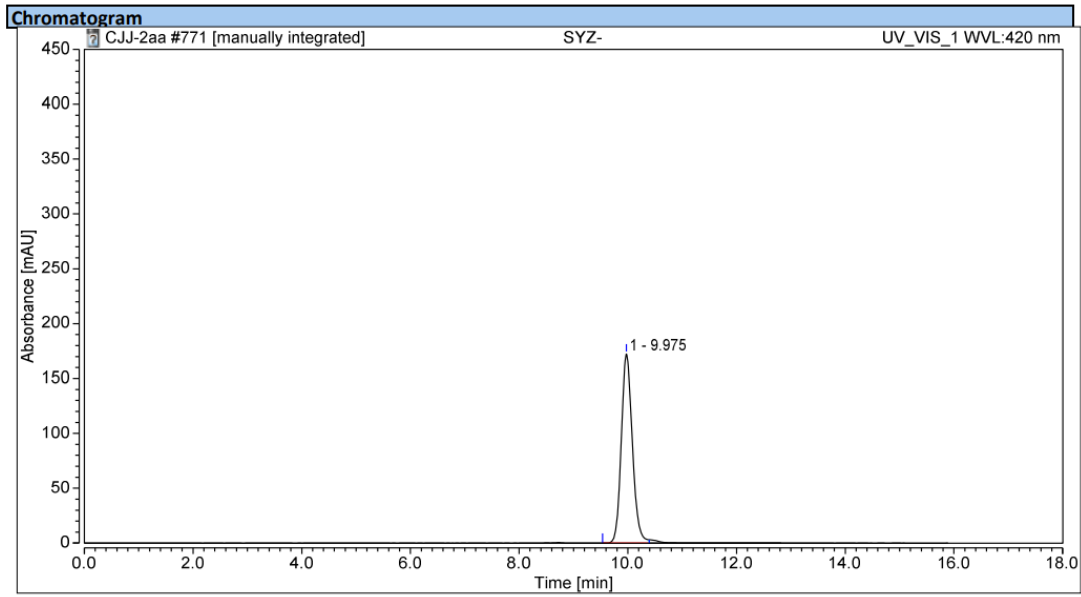

| Integration Results |           |                       |                 |                |                    |                      |                |
|---------------------|-----------|-----------------------|-----------------|----------------|--------------------|----------------------|----------------|
| No.                 | Peak Name | Retention Time<br>min | Area<br>mAU*min | Height<br>mAU  | Relative Area<br>% | Relative Height<br>% | Amount<br>n.a. |
| 1                   |           | 9.975                 | 40.590          | 172.351        | 100.00             | 100.00               | n.a.           |
| <b>Total:</b>       |           |                       | <b>40.590</b>   | <b>172.351</b> | <b>100.00</b>      | <b>100.00</b>        |                |

HPLC analysis: (R)-1b

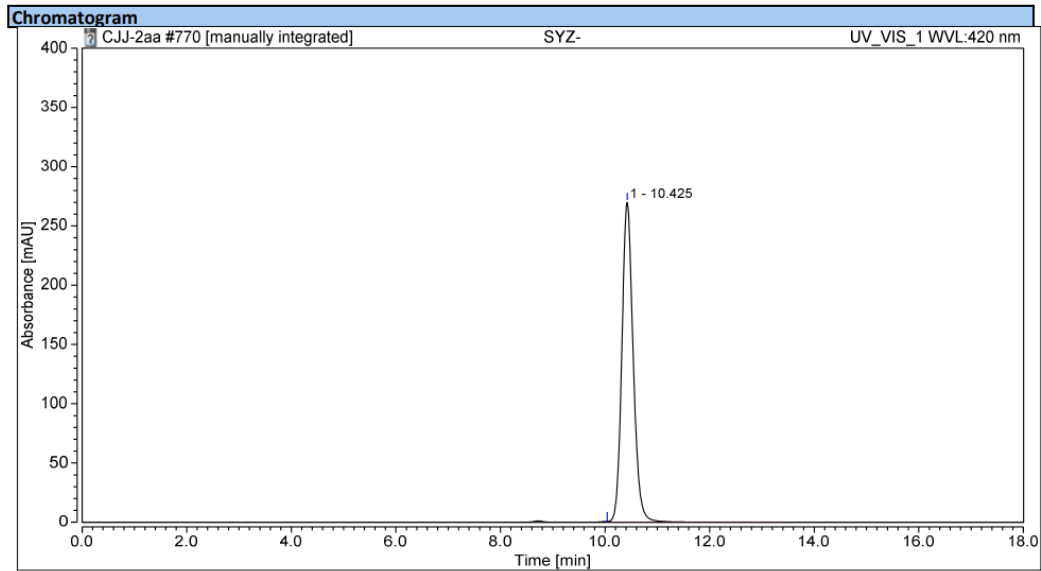

| Integration Results |           |                       |                 |                |                    |                      |                |
|---------------------|-----------|-----------------------|-----------------|----------------|--------------------|----------------------|----------------|
| No.                 | Peak Name | Retention Time<br>min | Area<br>mAU*min | Height<br>mAU  | Relative Area<br>% | Relative Height<br>% | Amount<br>n.a. |
| 1                   |           | 10.425                | 68.017          | 269.948        | 100.00             | 100.00               | n.a.           |
| <b>Total:</b>       |           |                       | <b>68.017</b>   | <b>269.948</b> | <b>100.00</b>      | <b>100.00</b>        |                |

## 9. <sup>1</sup>H, <sup>13</sup>C, <sup>11</sup>B and <sup>19</sup>F NMR spectra for the new chiral BOPPYs

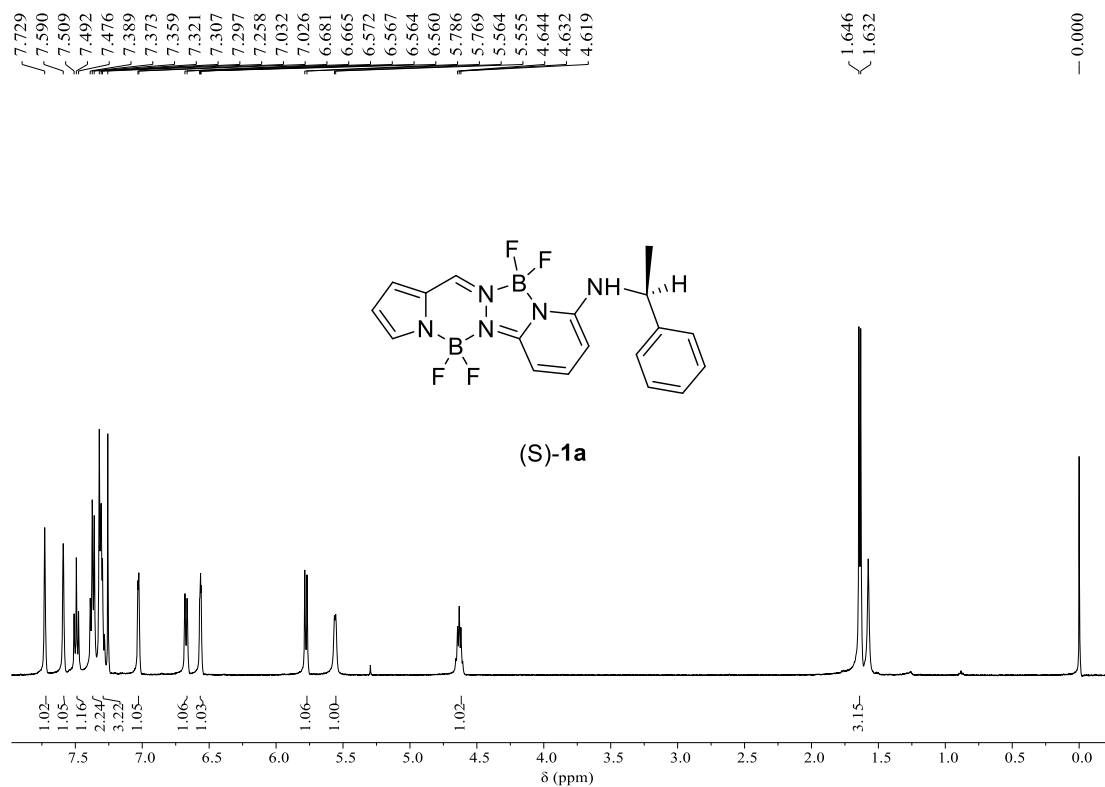

<sup>1</sup>H NMR spectrum of (S)-1a in CDCl<sub>3</sub>

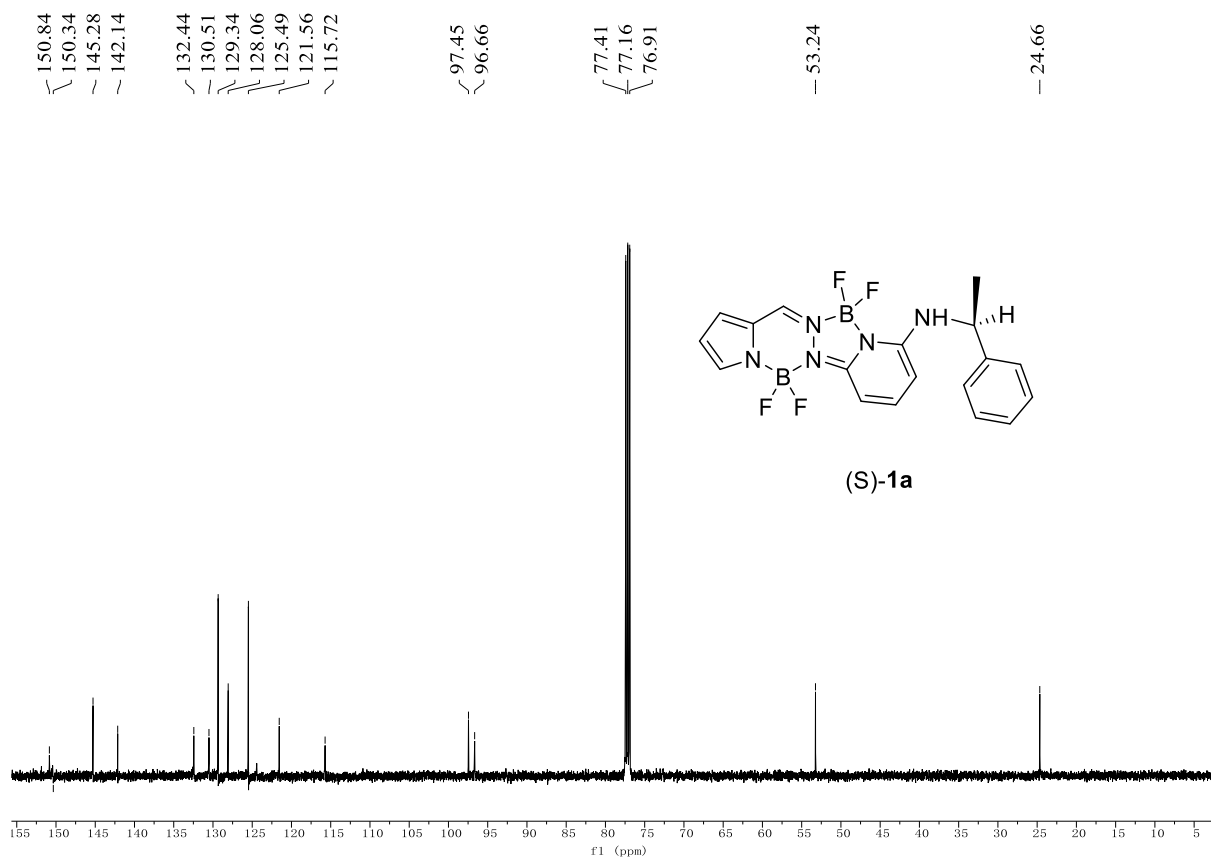

<sup>13</sup>C NMR spectrum of (S)-1a in CDCl<sub>3</sub>



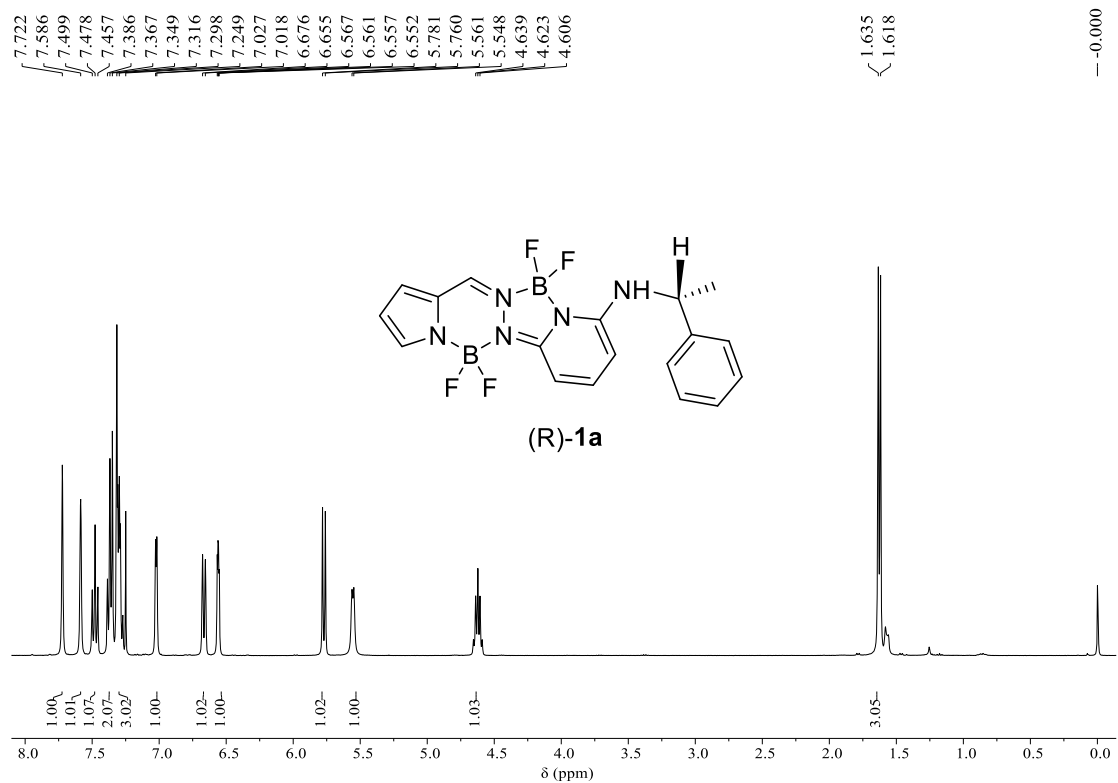

**<sup>1</sup>H NMR spectrum of (R)-1a in CDCl<sub>3</sub>**

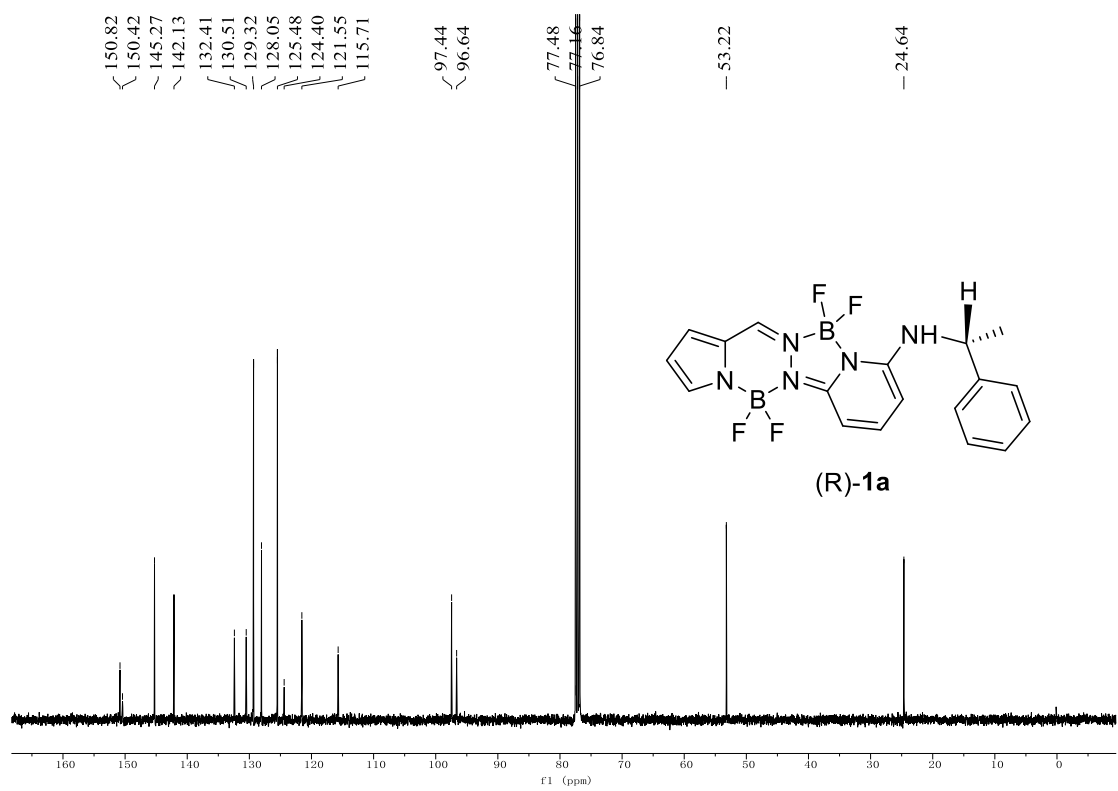

**<sup>13</sup>C NMR spectrum of (R)-1a in CDCl<sub>3</sub>**

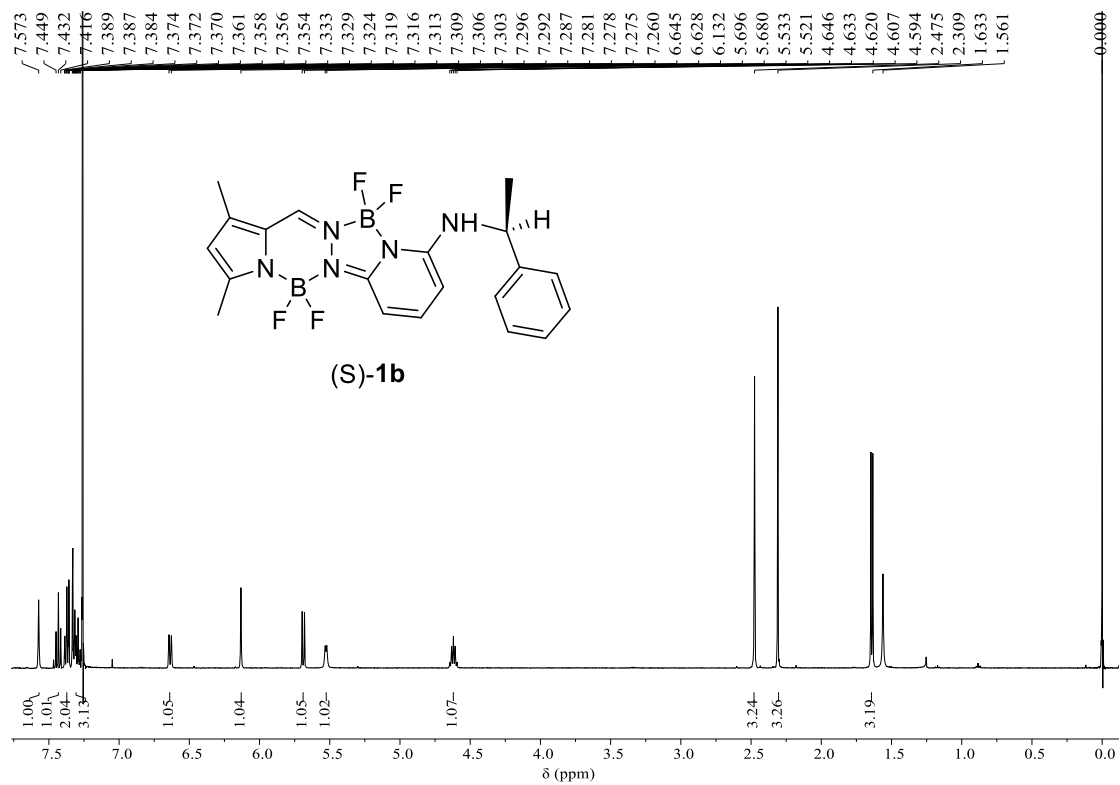

$^1\text{H}$  NMR spectrum of **(S)-1b** in  $\text{CDCl}_3$

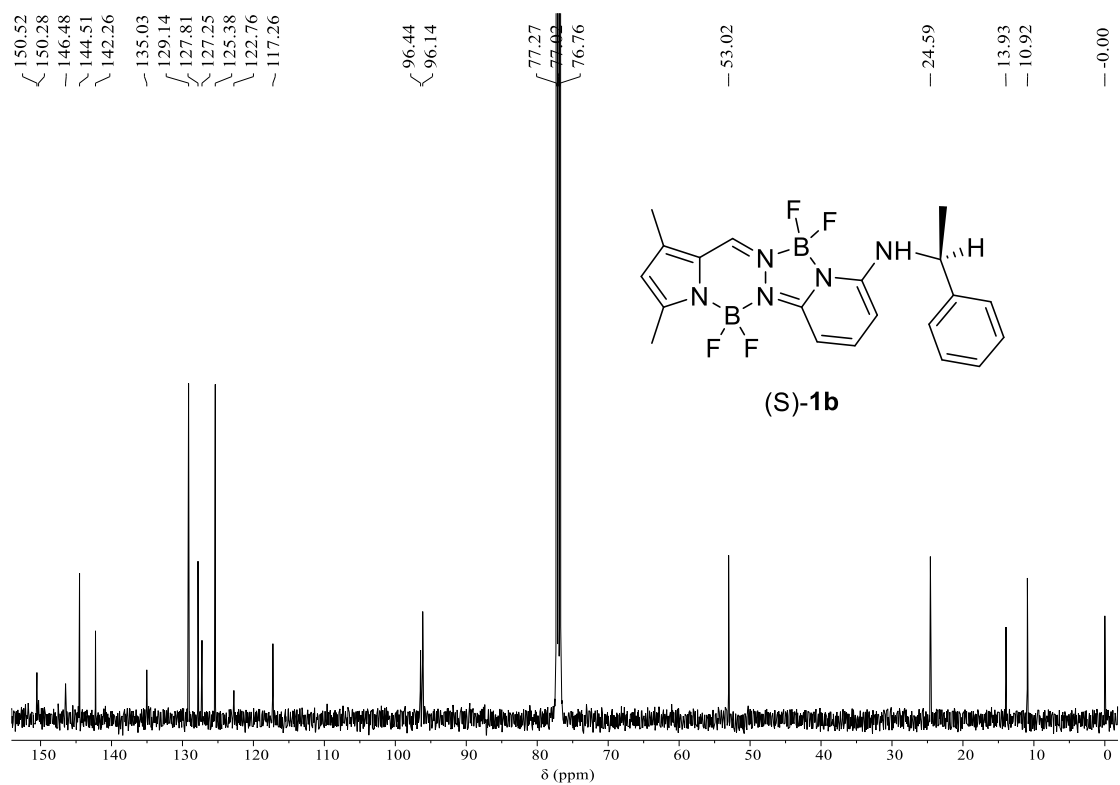

$^{13}\text{C}$  NMR spectrum of **(S)-1b** in  $\text{CDCl}_3$

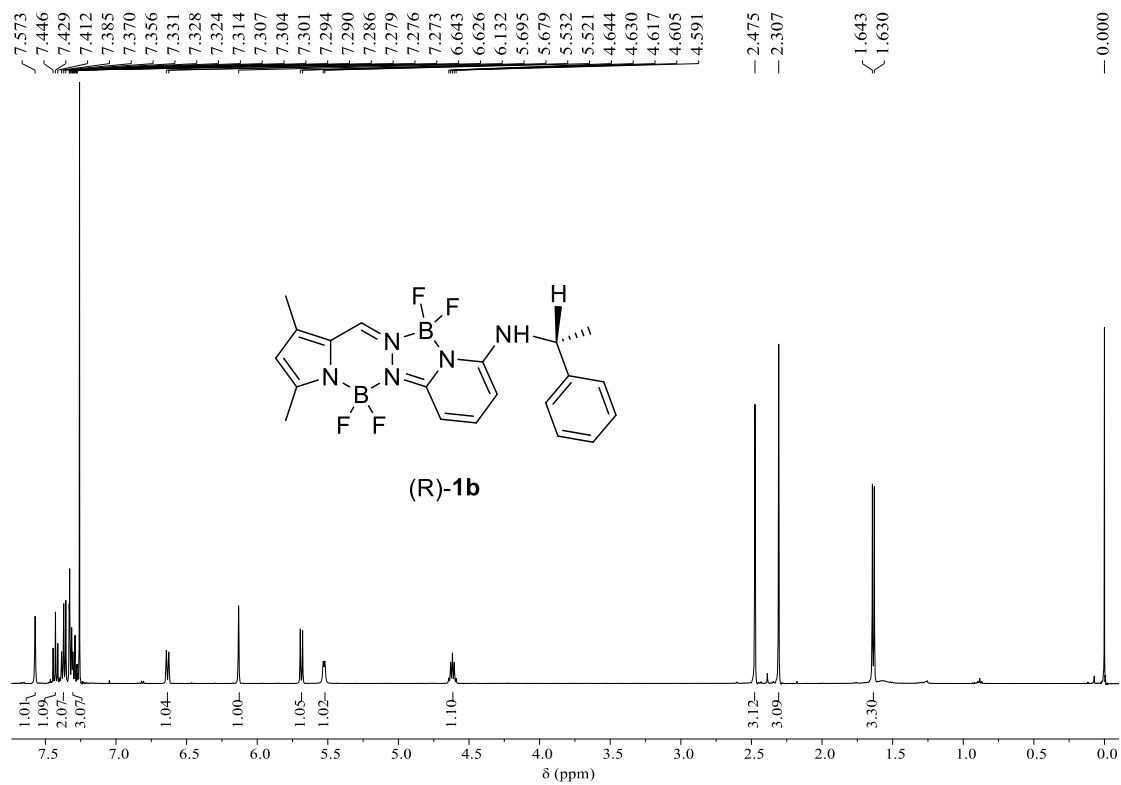

$^1\text{H}$  NMR spectrum of (R)-1b in  $\text{CDCl}_3$

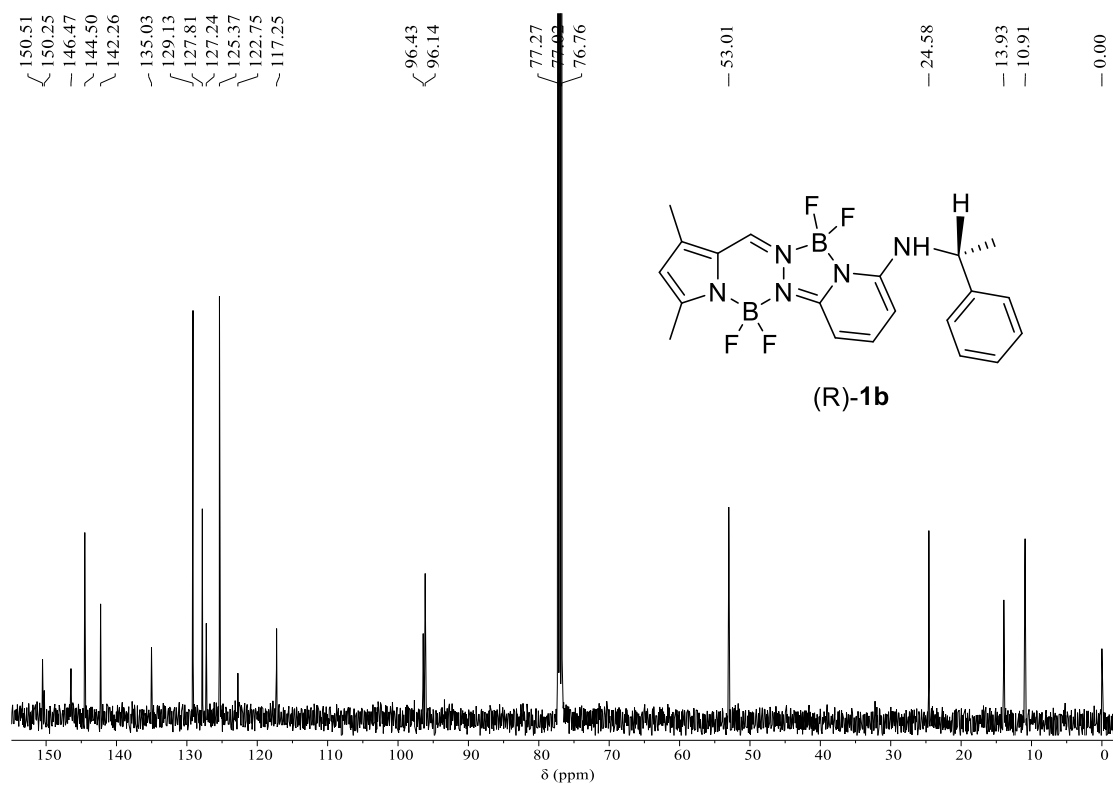

$^{13}\text{C}$  NMR spectrum of (R)-1b in  $\text{CDCl}_3$

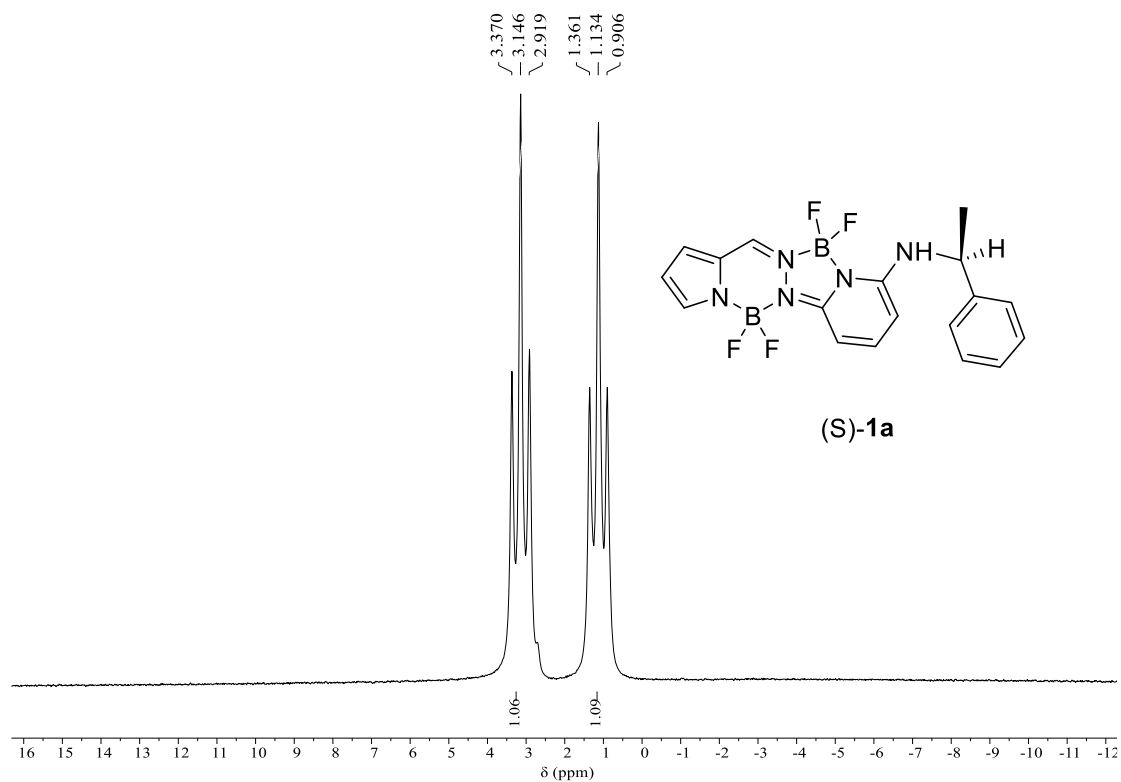

$^{11}\text{B}$  NMR spectrum of **(S)-1a** in  $\text{CDCl}_3$

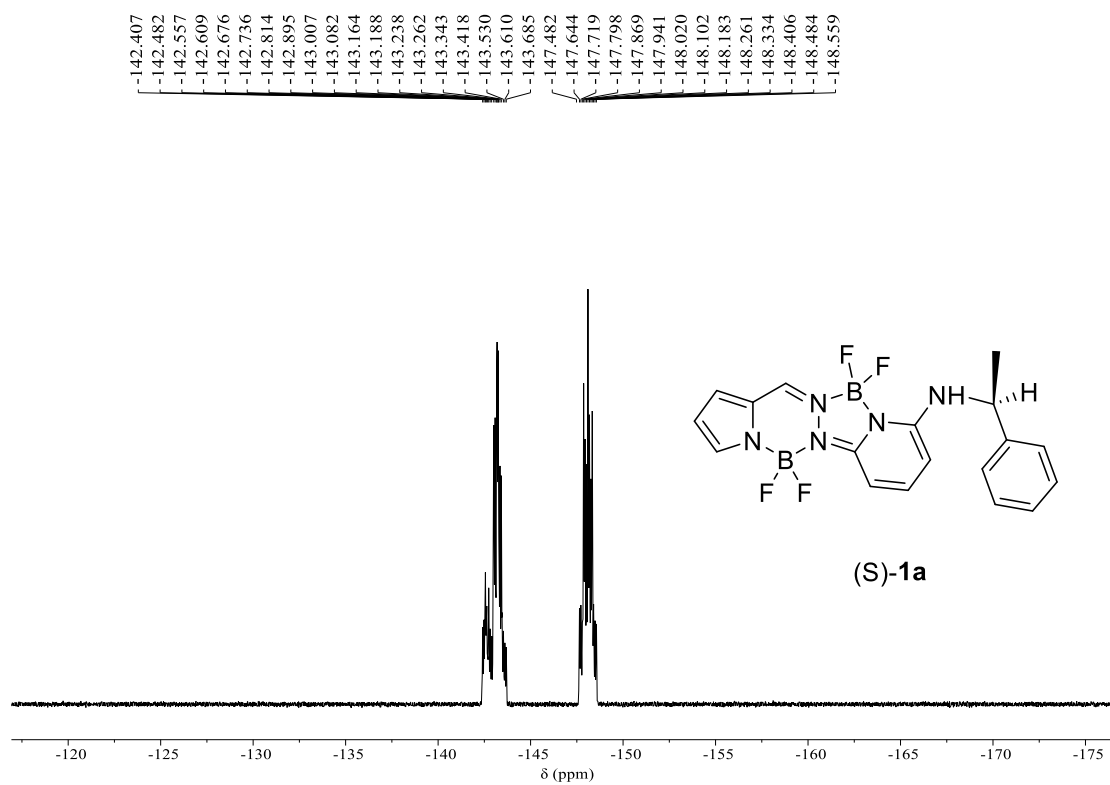

$^{19}\text{F}$  NMR spectrum of **(S)-1a** in  $\text{CDCl}_3$

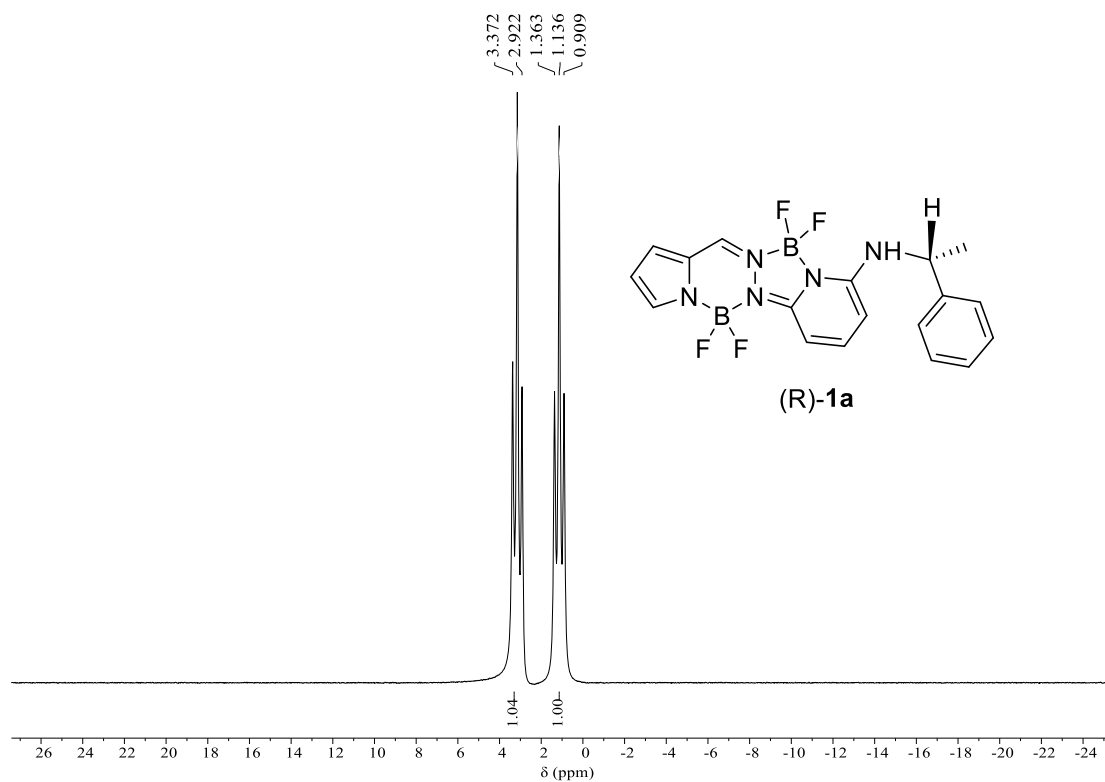

<sup>11</sup>B NMR spectrum of (R)-**1a** in CDCl<sub>3</sub>

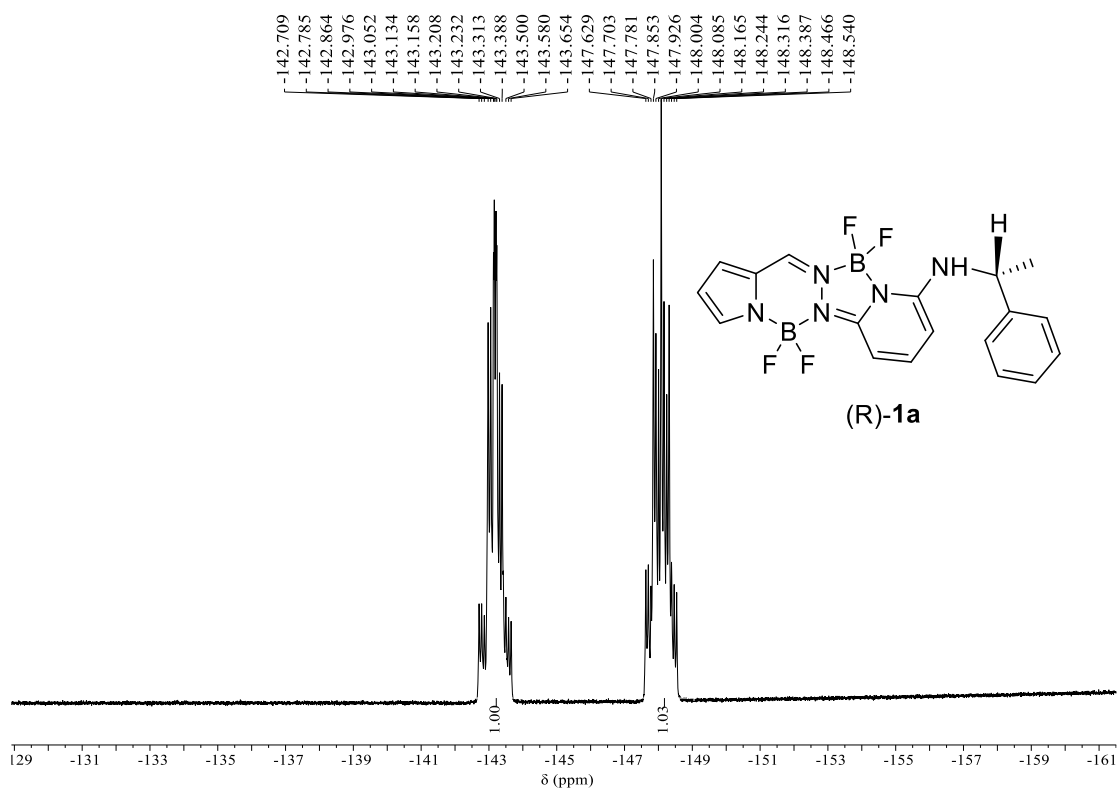

<sup>19</sup>F NMR spectrum of (R)-**1a** in CDCl<sub>3</sub>

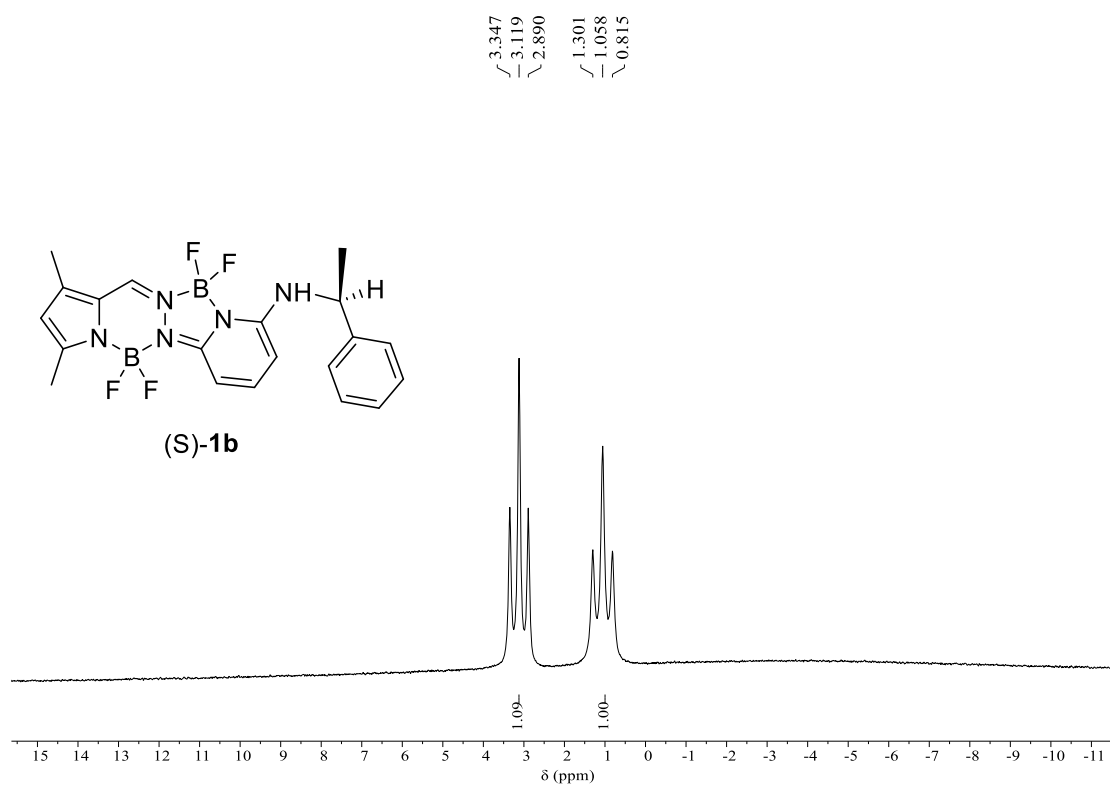

$^{11}\text{B}$  NMR spectrum of (S)-**1b** in  $\text{CDCl}_3$

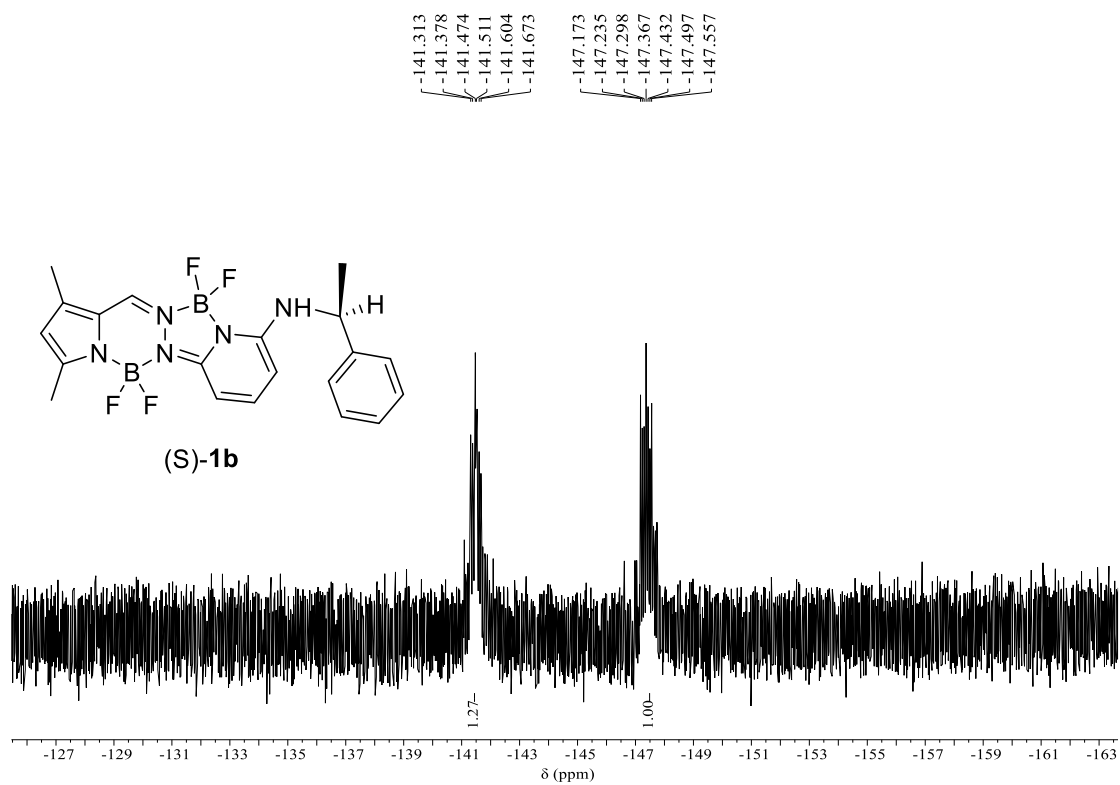

$^{19}\text{F}$  NMR spectrum of (S)-**1b** in  $\text{CDCl}_3$

/ 3.350  
 \ 3.122  
 \ 2.892  
 / 1.304  
 \ 1.060  
 \ 0.818

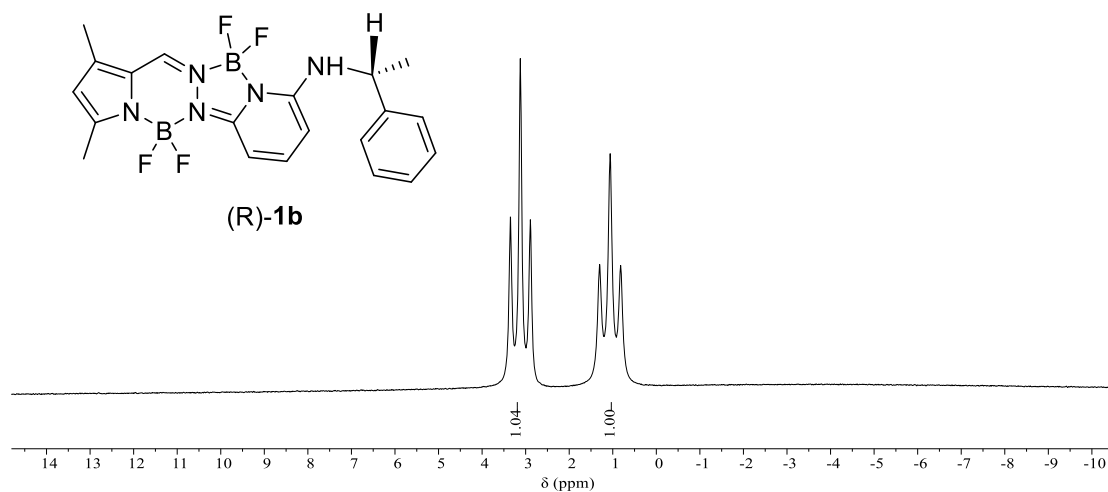

$^{11}\text{B}$  NMR spectrum of (R)-**1b** in  $\text{CDCl}_3$

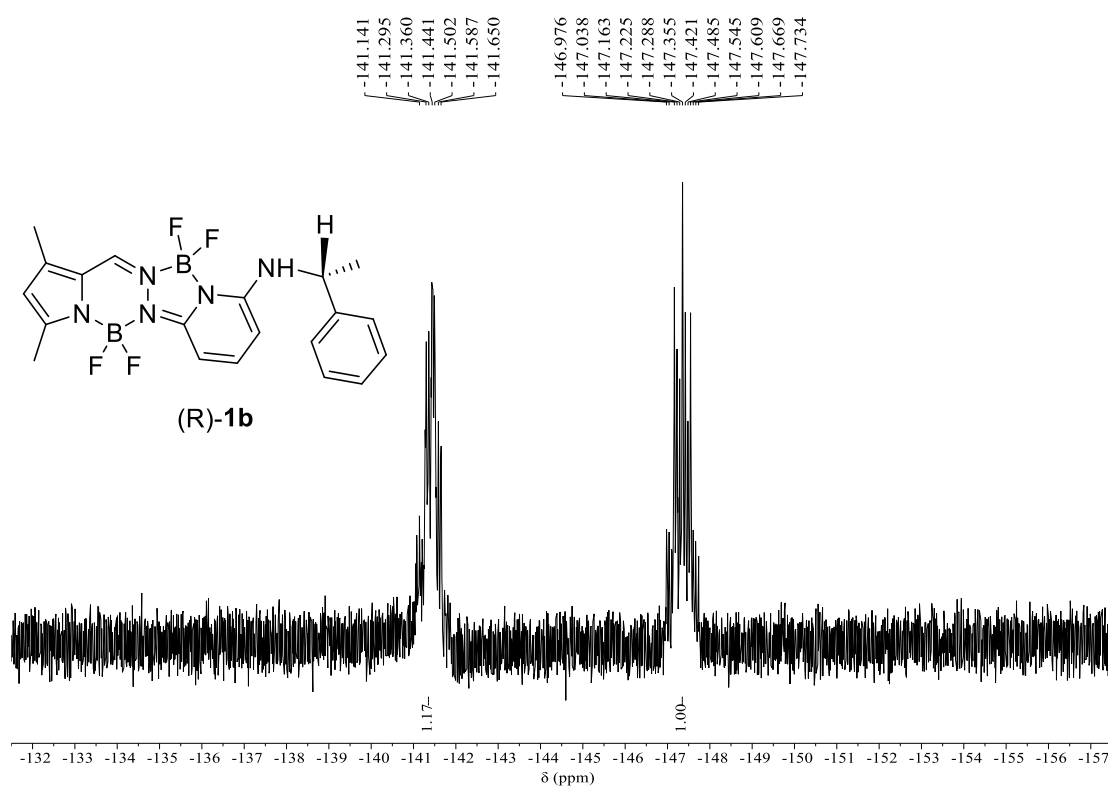

$^{19}\text{F}$  NMR spectrum of (R)-**1b** in  $\text{CDCl}_3$

## 10. HRMS for the new chiral BOPPYs

### HRMS for (S)-1a

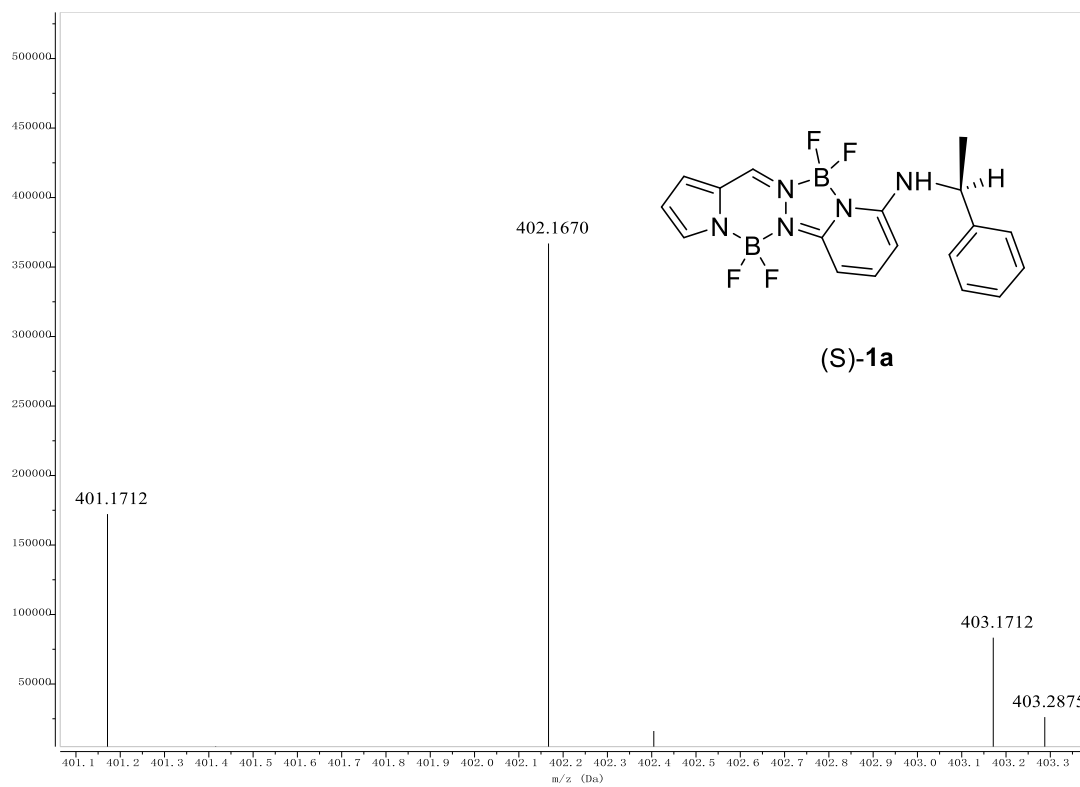

### HRMS for (R)-1a

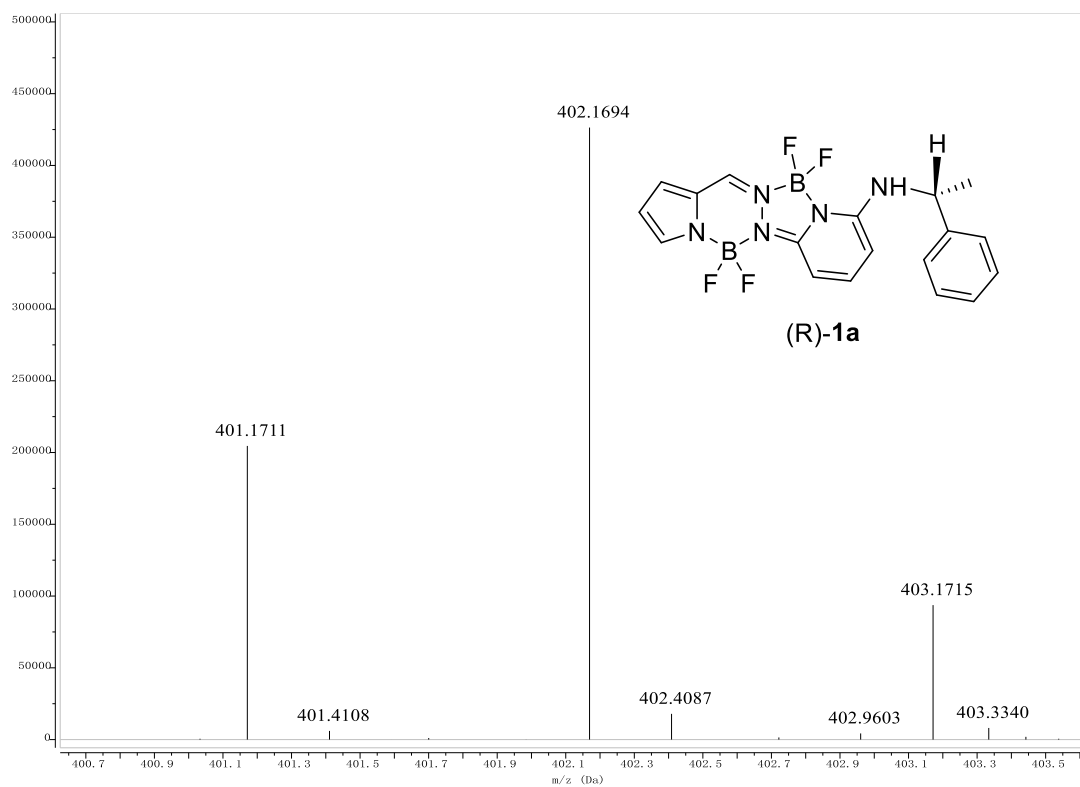



### HRMS for (S)-1b

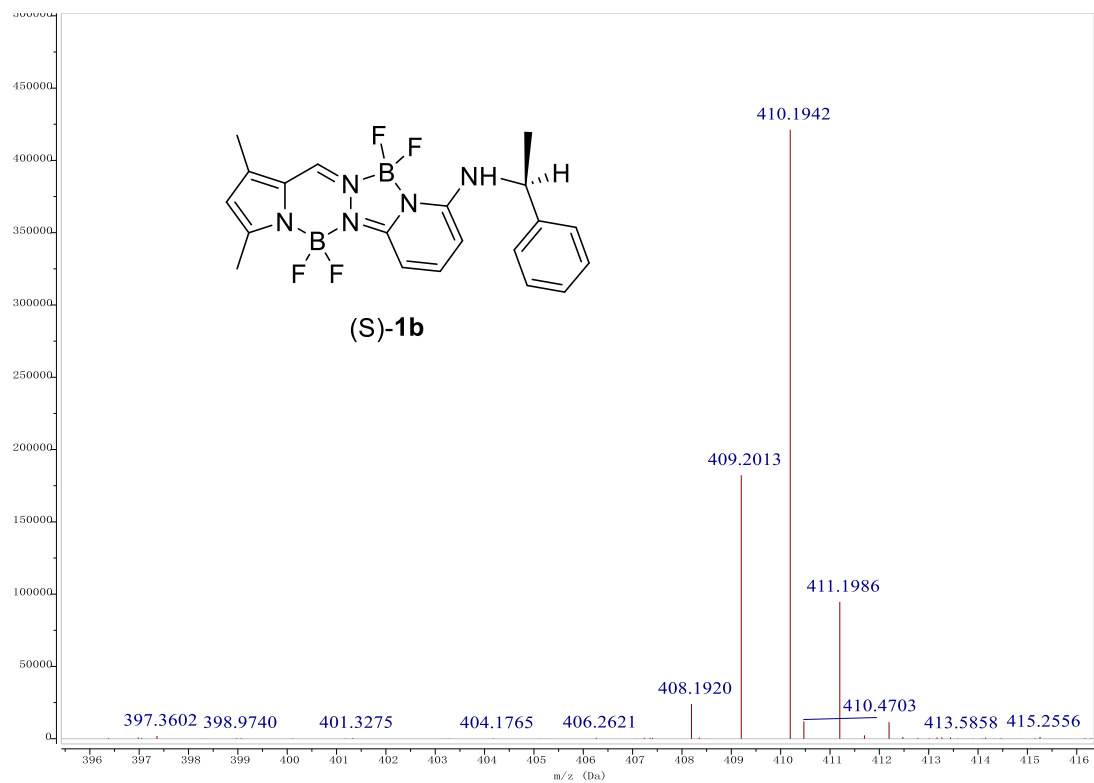

### HRMS for (R)-1b

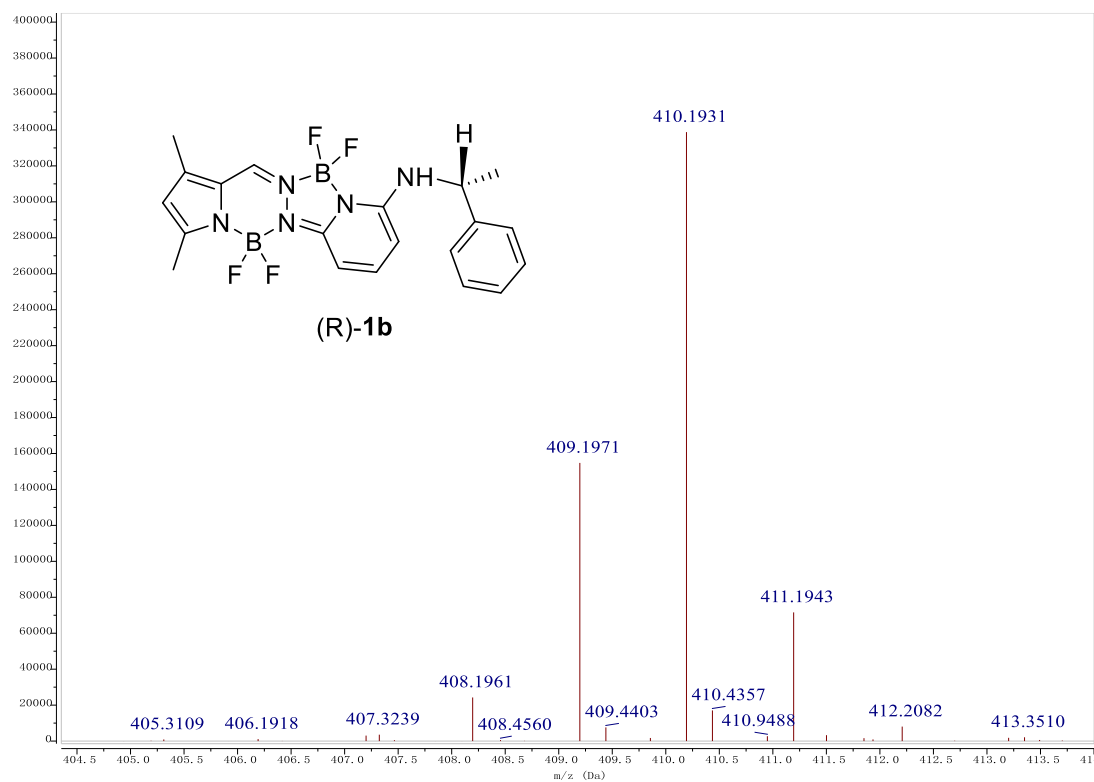

## **11. Author contribution statement**

Yingzhu Sun: Investigation, data testing, validation, editing.

Changjiang Yu: Writing, supervision, reviewing, funding acquisition.

Wanping Qian: Data testing.

Hongtao Zhang: Writing about crystals.

Lijuan Jiao: Reviewing, supervision.

Jiazhu Li: Supervision, reviewing.

Minghua Liu: Supervision, reviewing.

Erhong Hao: Funding acquisition, validation, reviewing, supervision.
